# Supplementary material for: Network propagation-based prioritization of long tail genes in 17 cancer types
Source: Springer Nature journal article supplement (doi:10.1186/s13059-021-02504-x), 2021-10-07

**Fig. S1** Impact on cancer cell line survival of UMG lists before the DepMap filtering step compared to other methods' lists. Extension to Figure 4.

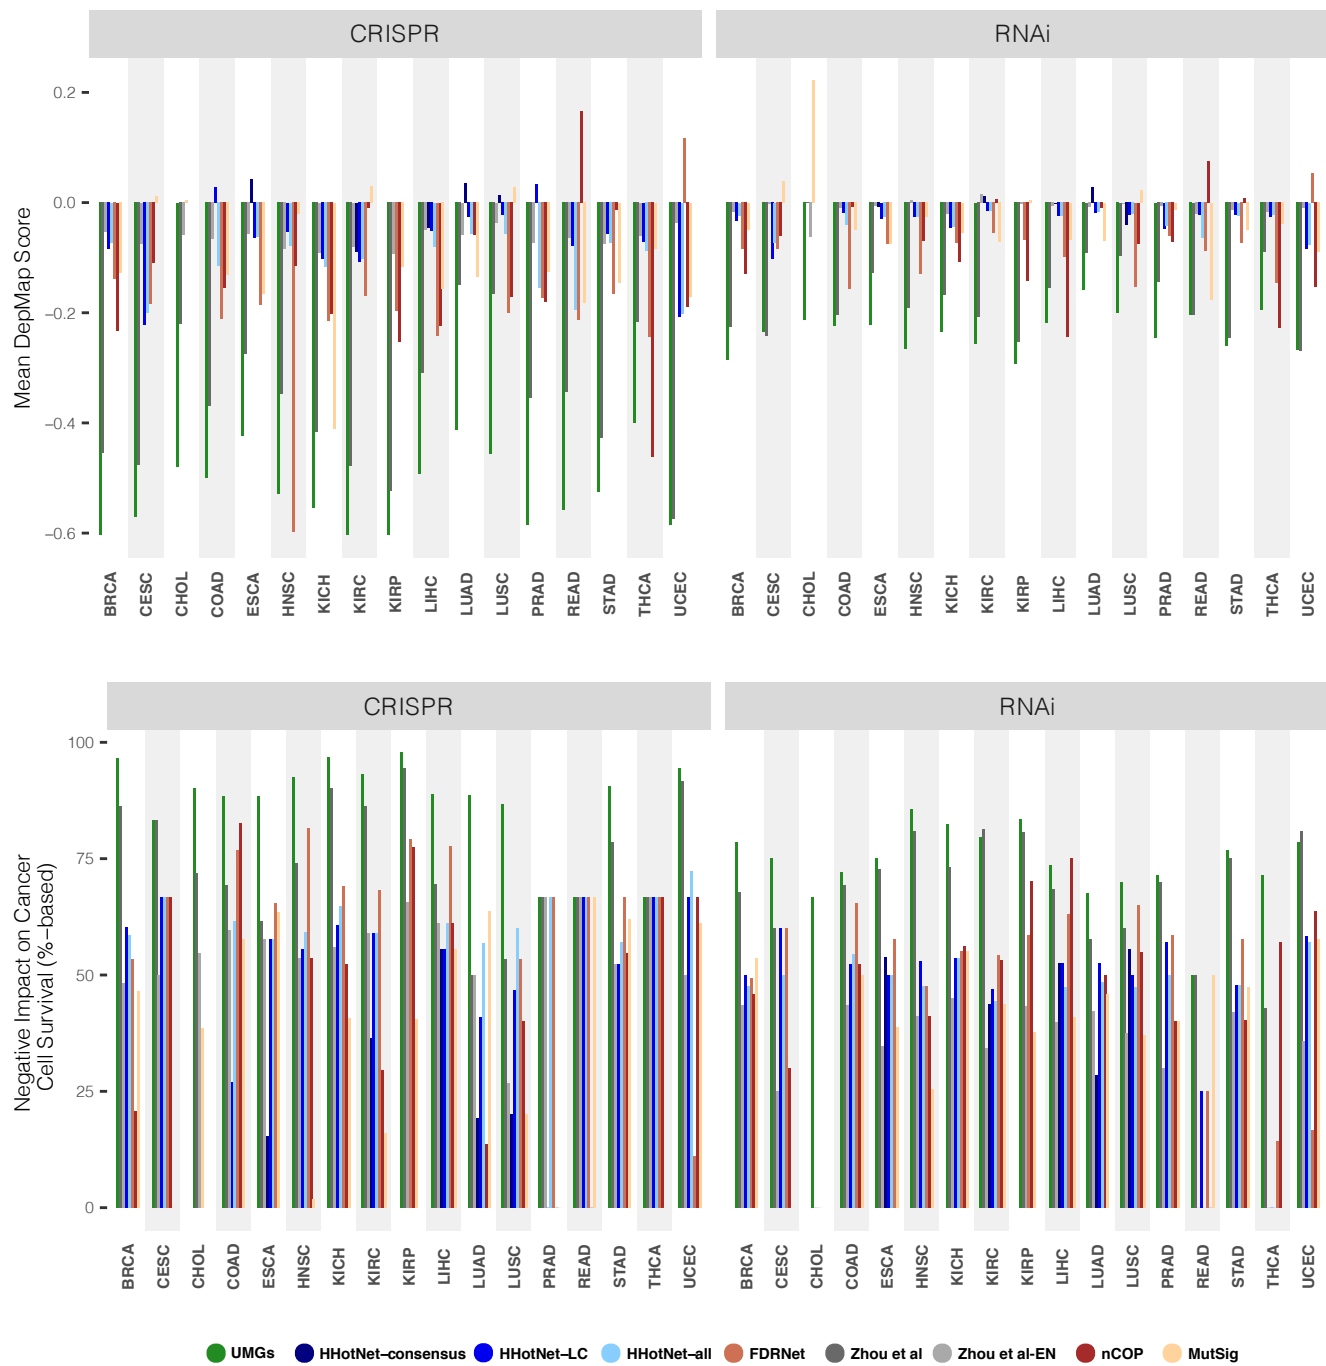

**Fig. S2** Impact on cancer cell line survival of UMG lists compared to other methods' lists, all including known driver genes. Extension to Figure 4.

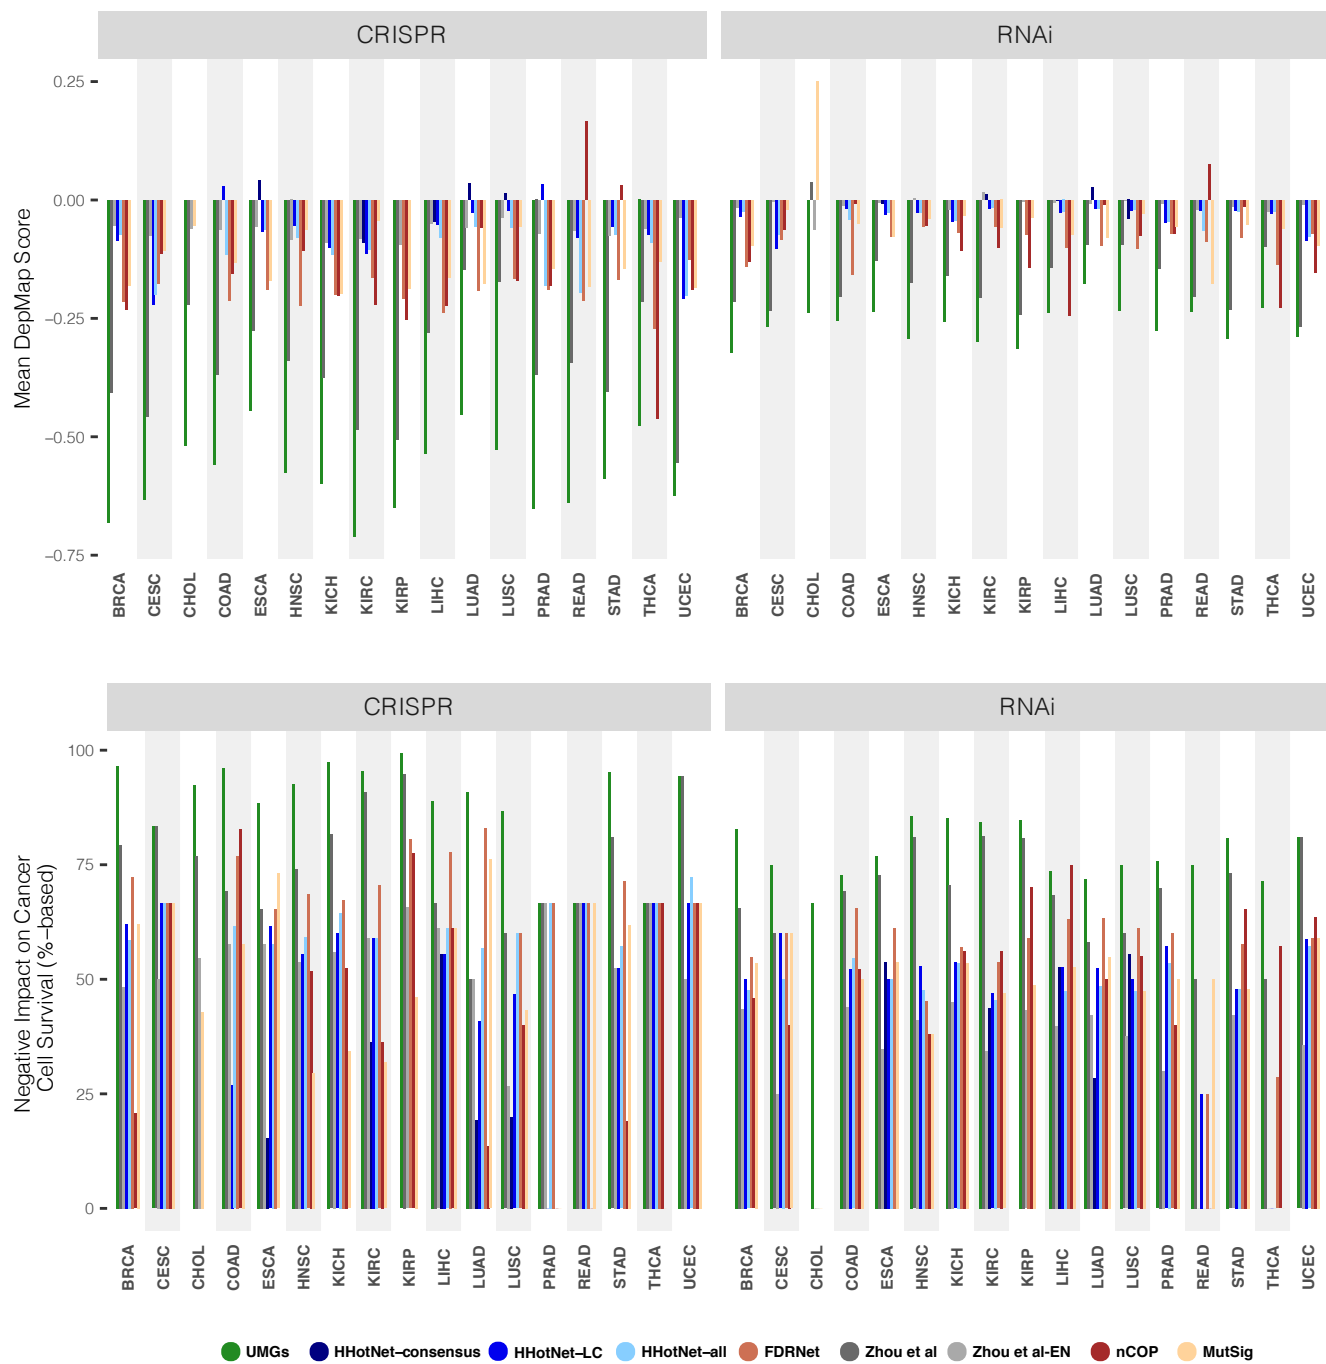

**Fig. S3** Impact on cancer cell line survival of UMG lists before the DepMap filtering step compared to other methods' lists, all including known driver genes. Extension to Figure 4.

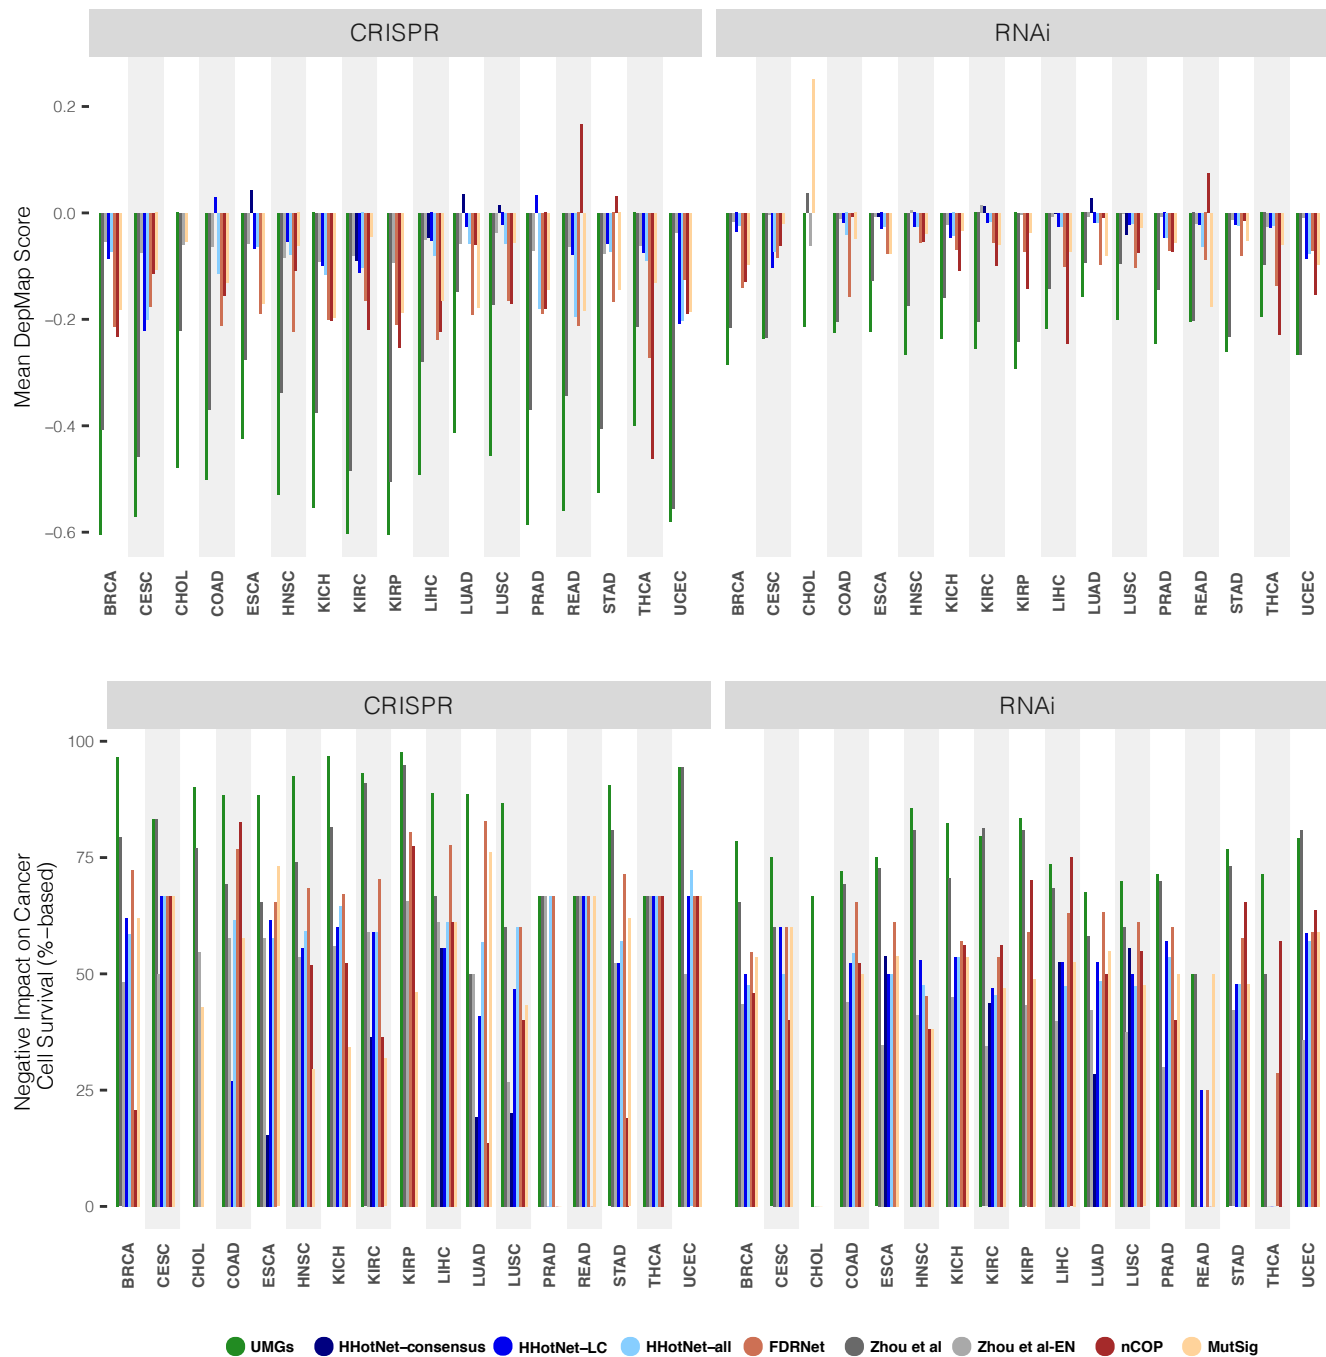

**Fig. S4** PPI network analysis of the relationships between UMGs (white nodes) and known driver genes (red) in CESC. Extension to Figure 5.

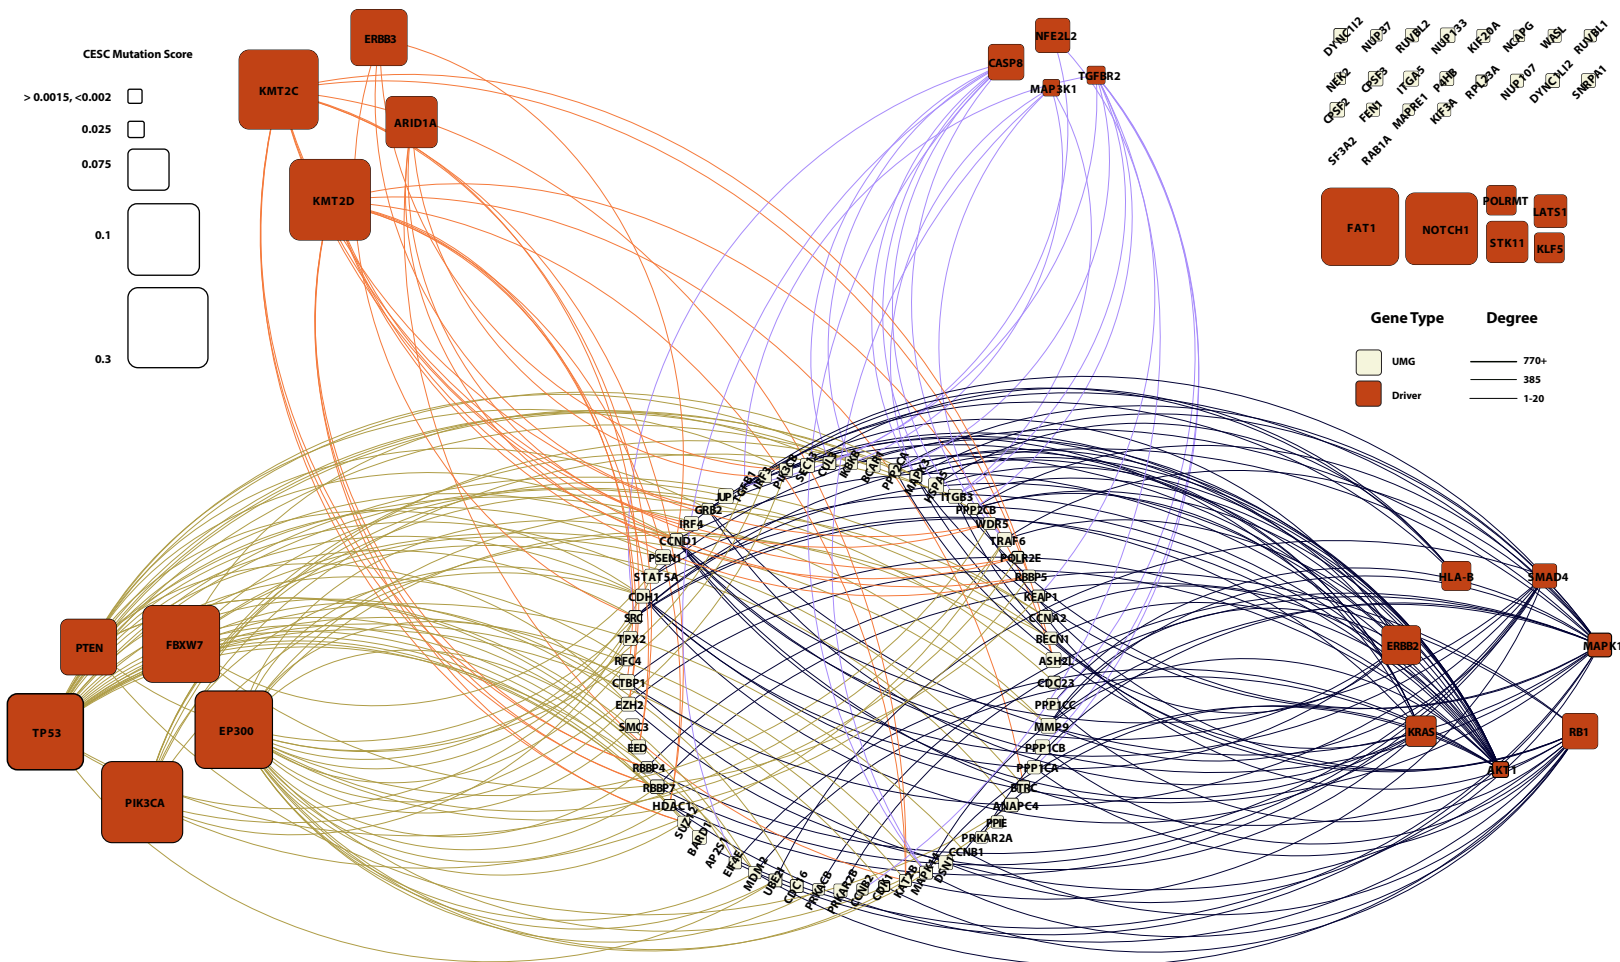

**Fig. S5** PPI network analysis of the relationships between UMGs (white nodes) and known driver genes (red) in CHOL. Extension to Figure 5.

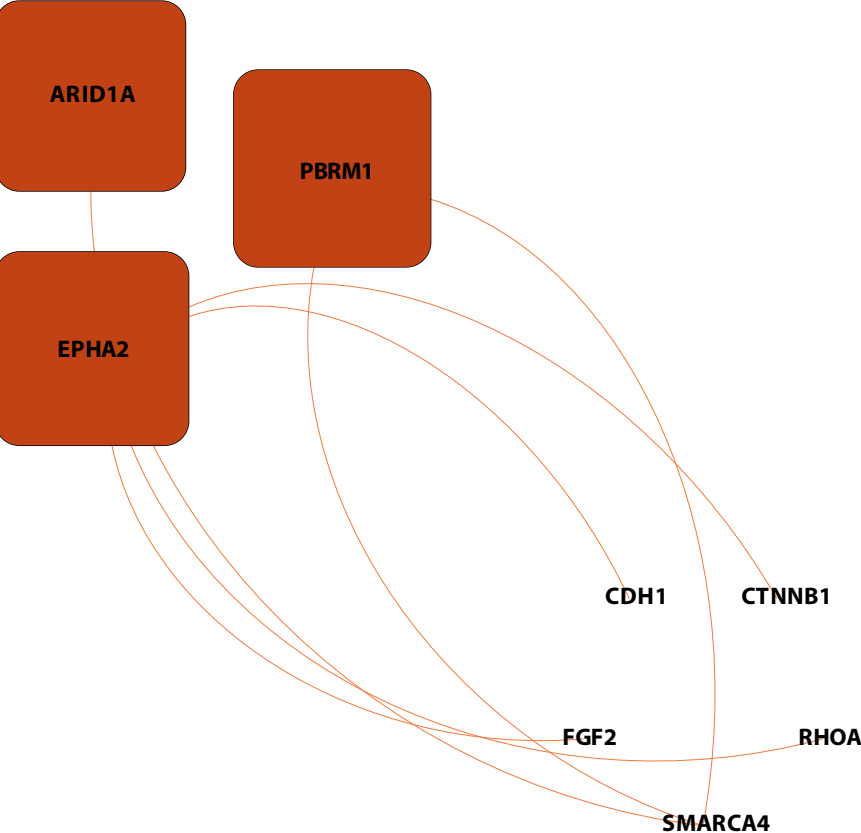

- CREB1
- PRKAR2B
- ITGA1
- HDAC1
- TRAF2
- AKT1
- DYNC1H1
- PPP1CC
- PPP1CA
- RBBP5
- MAP3K7
- P5MC5
- EIF4E
- RFC4
- ITGB3
- P5MC5
- RUVBL1
- CCNB2
- TUBB4B
- CCNB1
- POLR2E
- PPP2CB
- WDR5
- TRAF6

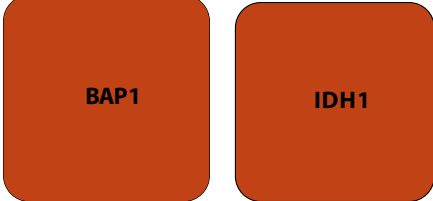

**Gene Type**

No Frame UMG

Driver

**Degree**

150

50

**CHOL Mutation Score**

0.35

0.1

< 0.0015

No Frame



**Fig. S7** PPI network analysis of the relationships between UMGs (white nodes) and known driver genes (red) in ESCA. Extension to Figure 5.

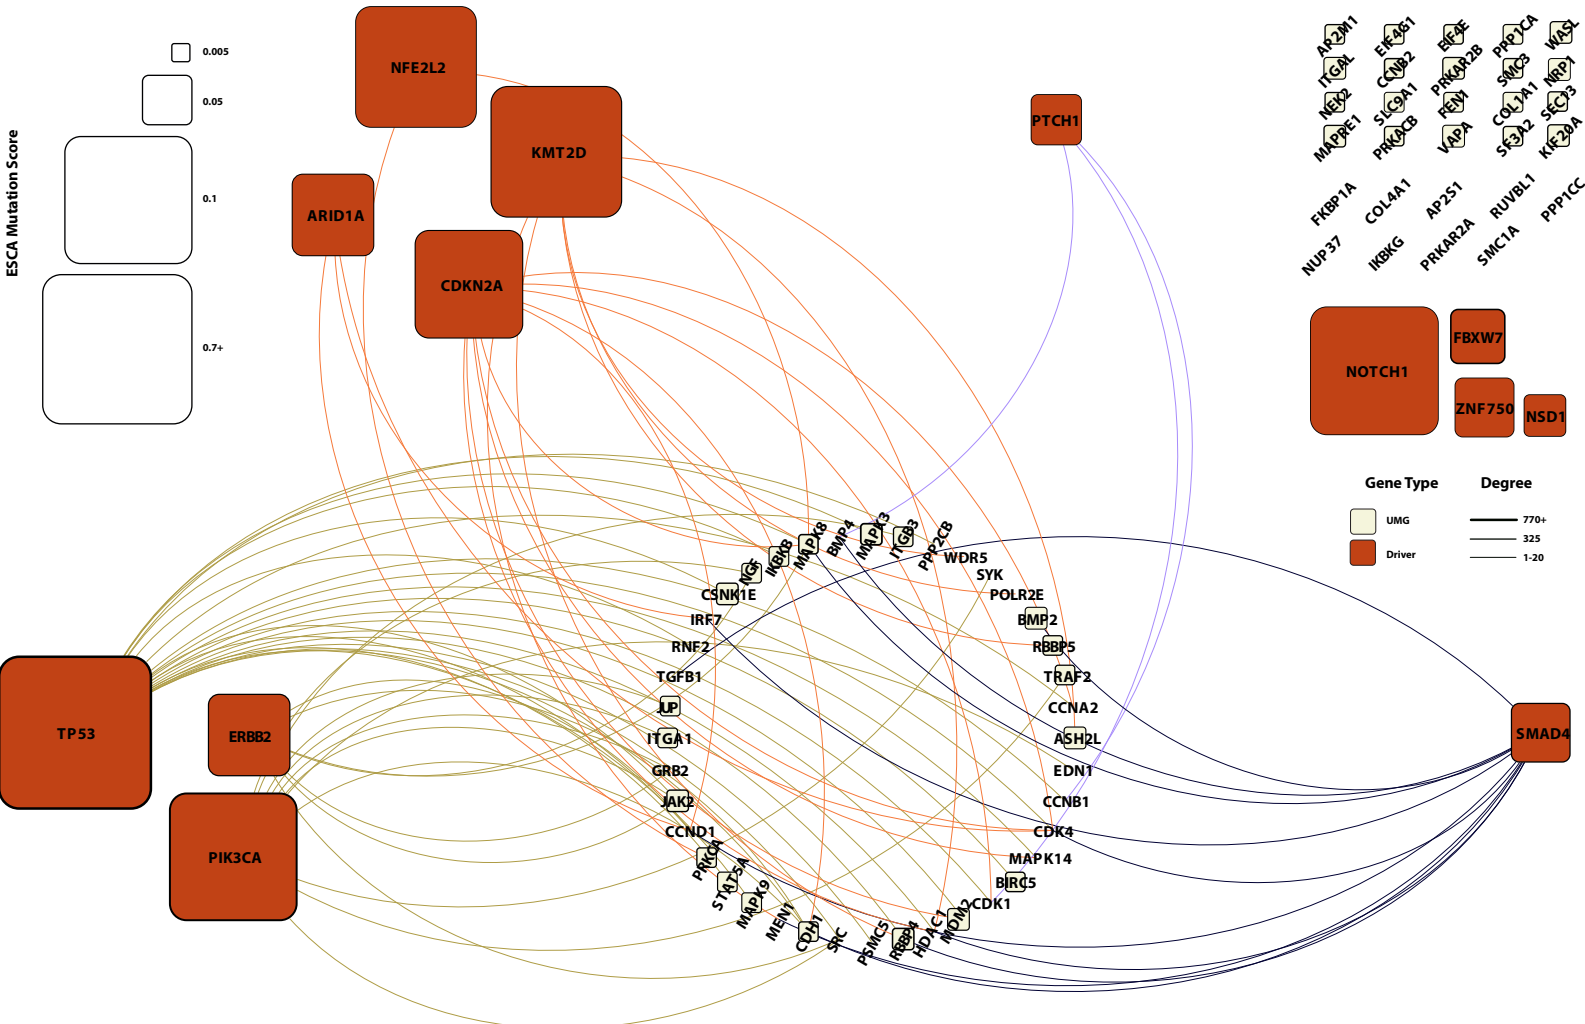



**Fig. S9** PPI network analysis of the relationships between UMGs (white nodes) and known driver genes (red) in KICH. Extension to Figure 5.

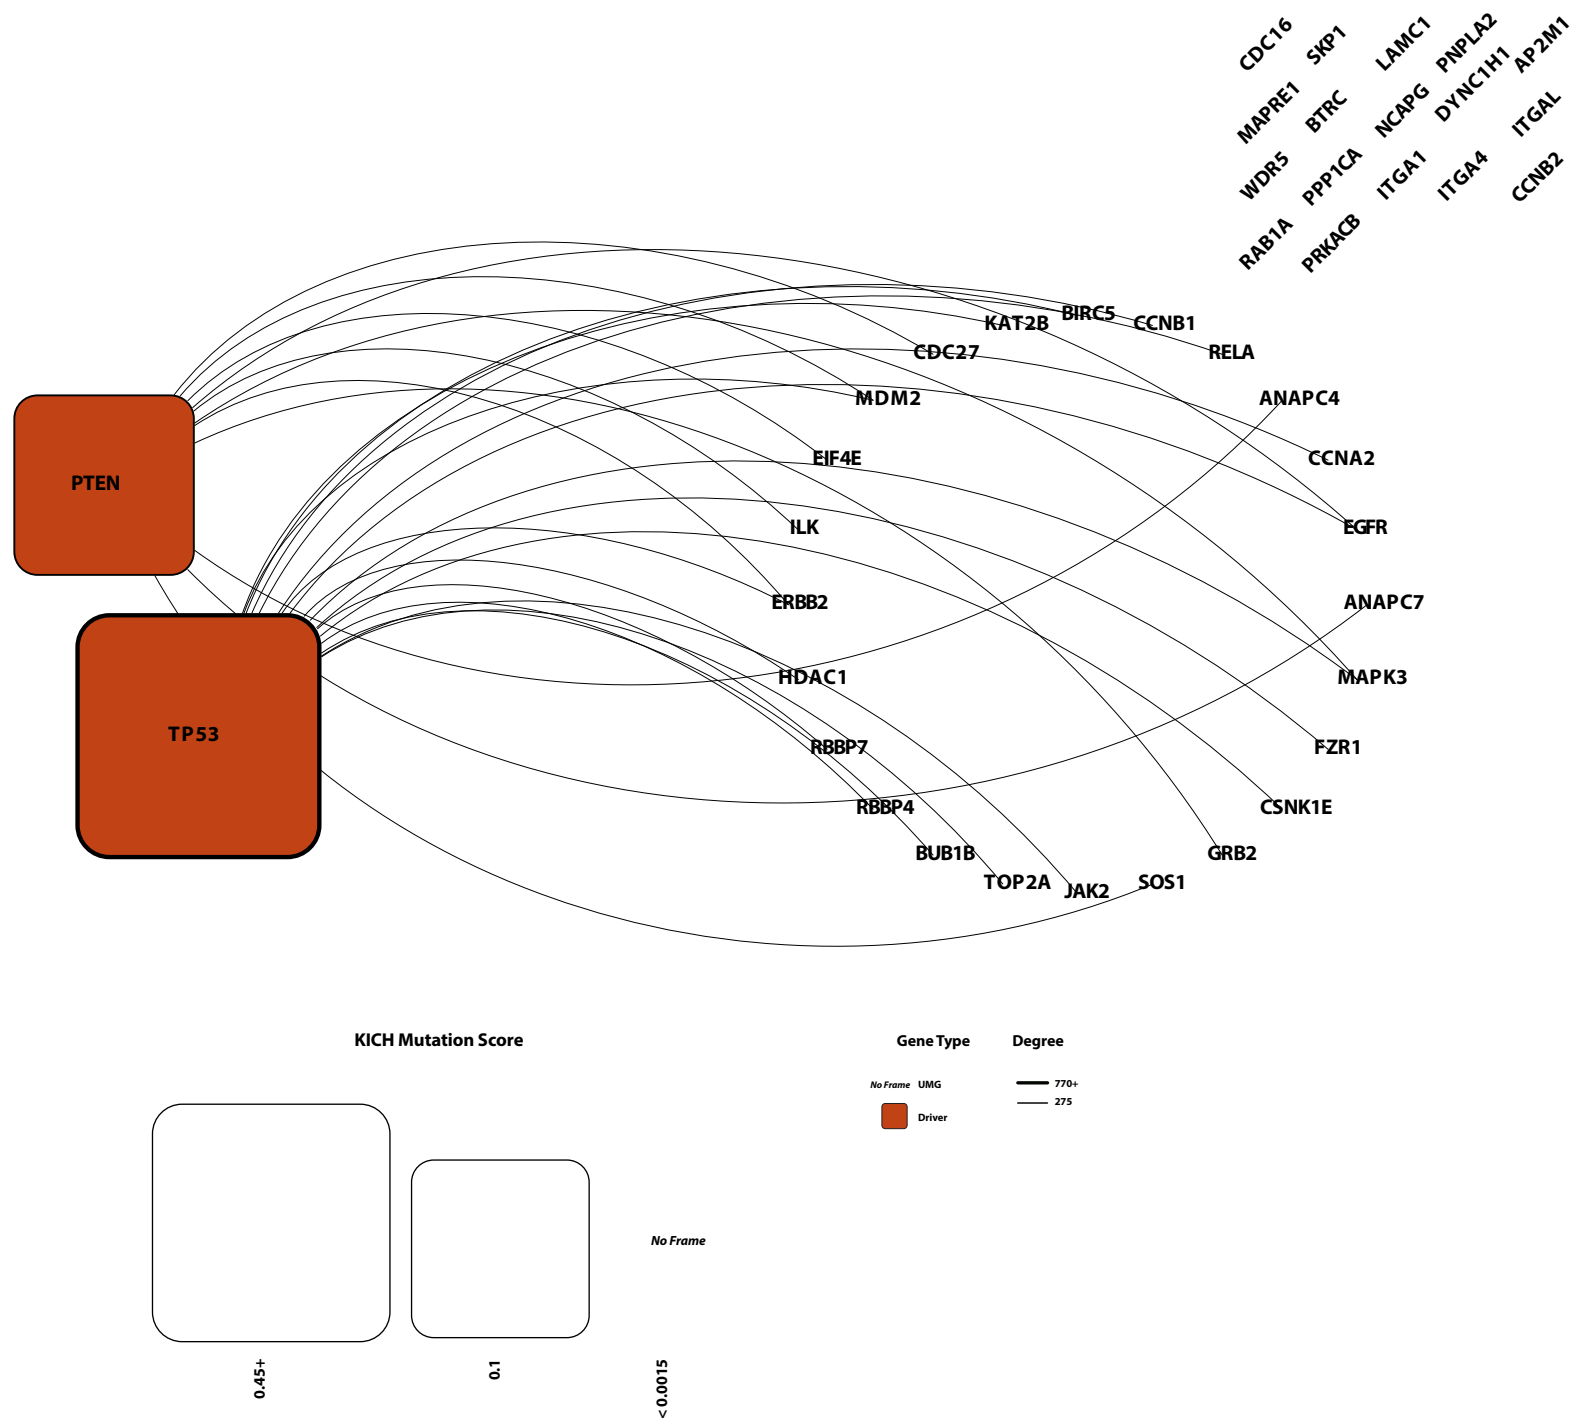

**Fig. S10** PPI network analysis of the relationships between UMGs (white nodes) and known driver genes (red) in KIRC. Extension to Figure 5.

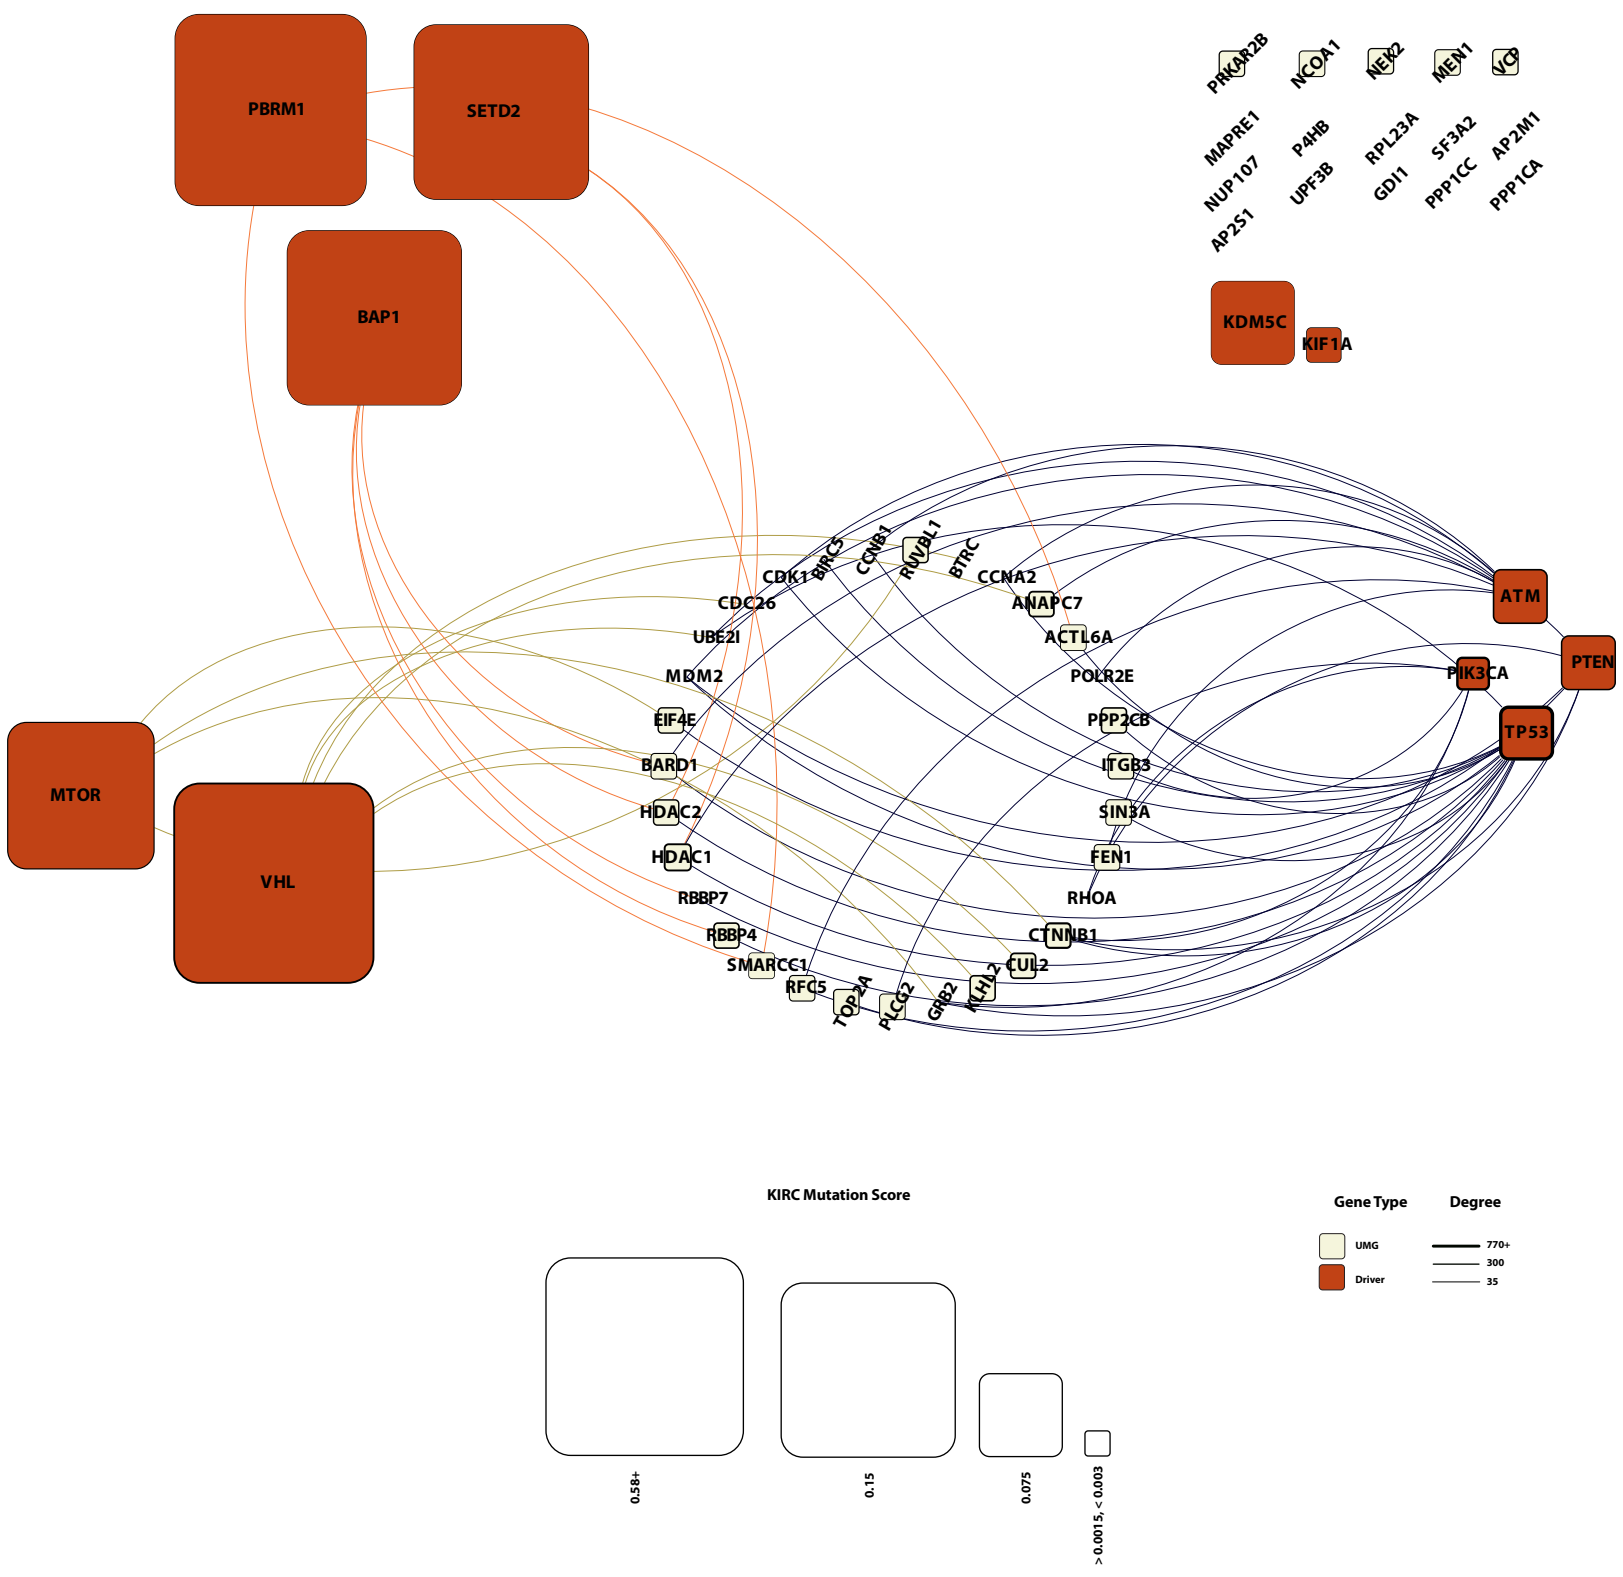

**Fig. S11** PPI network analysis of the relationships between UMGs (white nodes) and known driver genes (red) in KIRP. Extension to Figure 5.

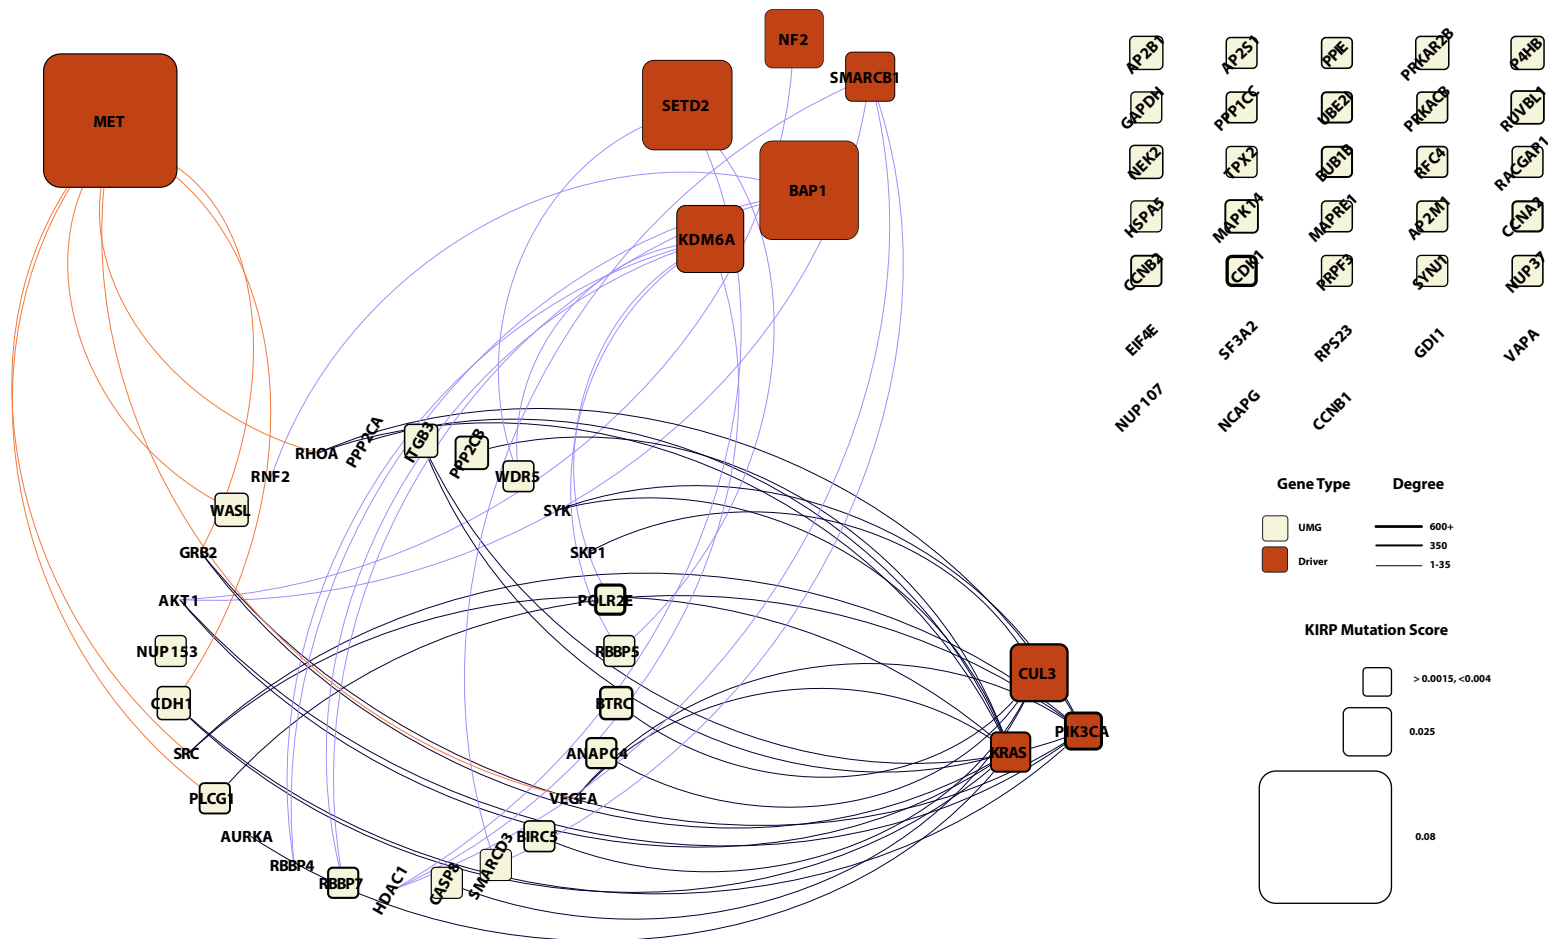

**Fig. S12** PPI network analysis of the relationships between UMGs (white nodes) and known driver genes (red) in LIHC. Extension to Figure 5.

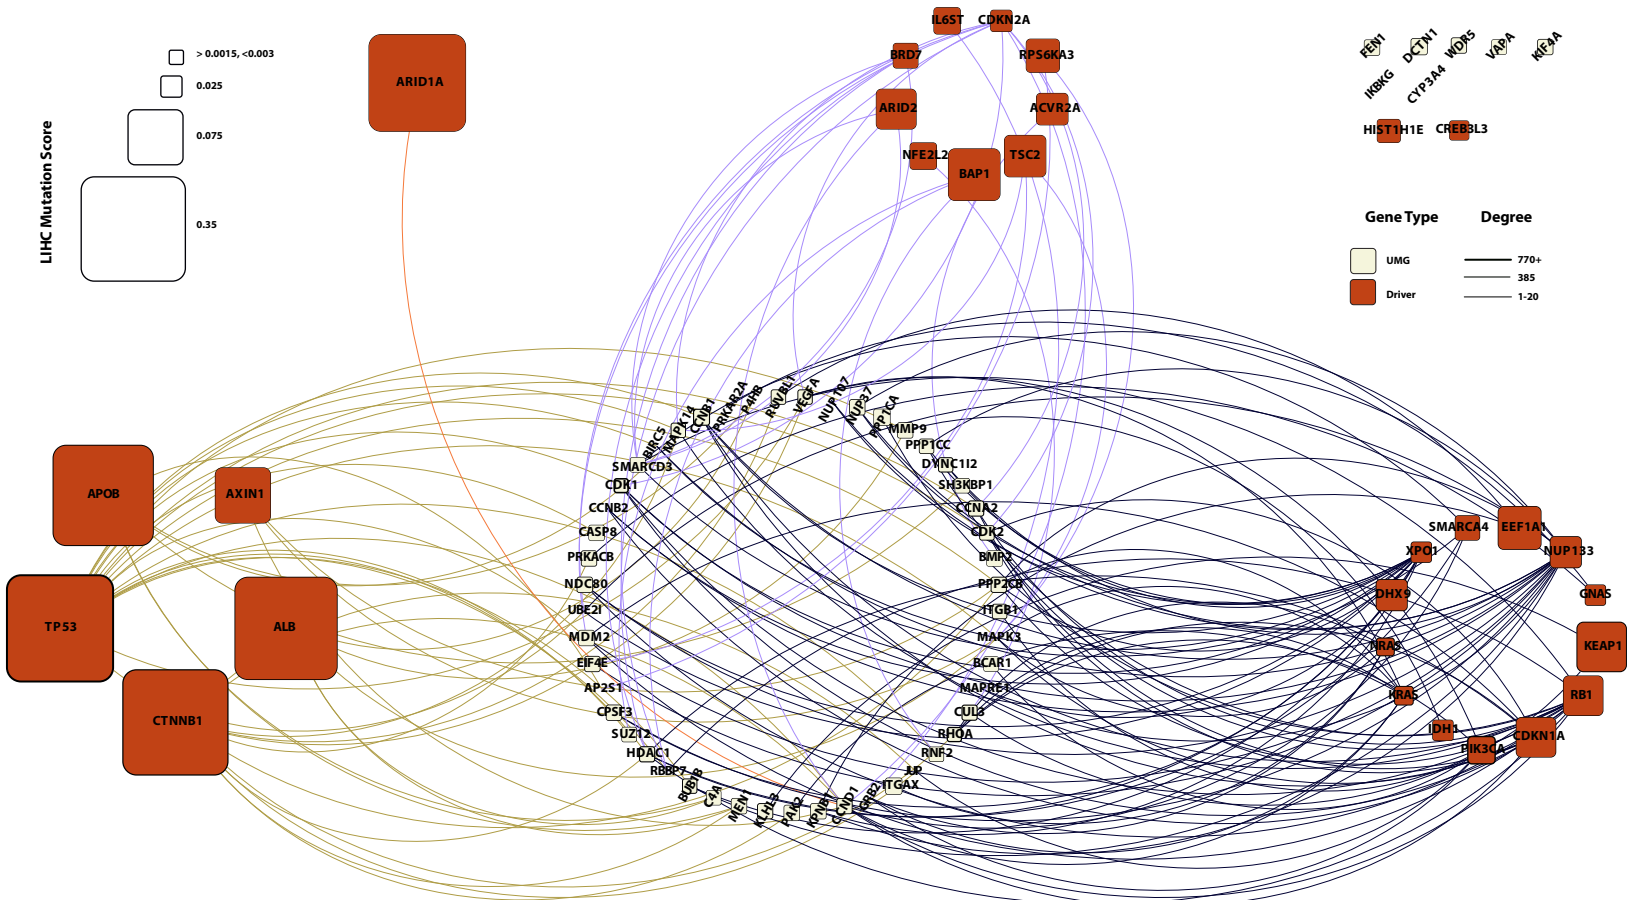







**Fig. S16** PPI network analysis of the relationships between UMGs (white nodes) and known driver genes (red) in READ. Extension to Figure 5.

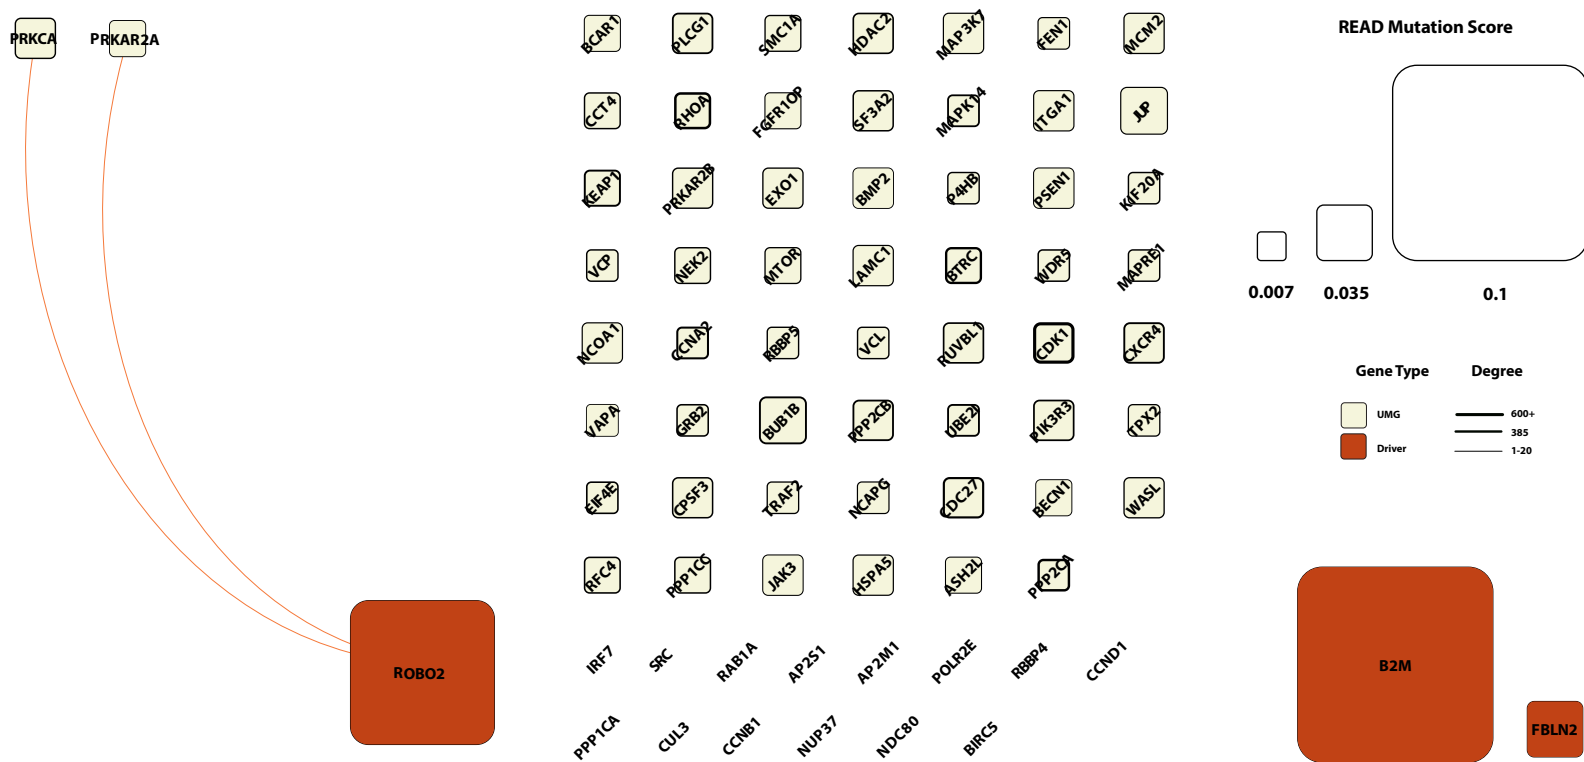

**Fig. S17** PPI network analysis of the relationships between UMGs (white nodes) and known driver genes (red) in STAD. Extension to Figure 5.

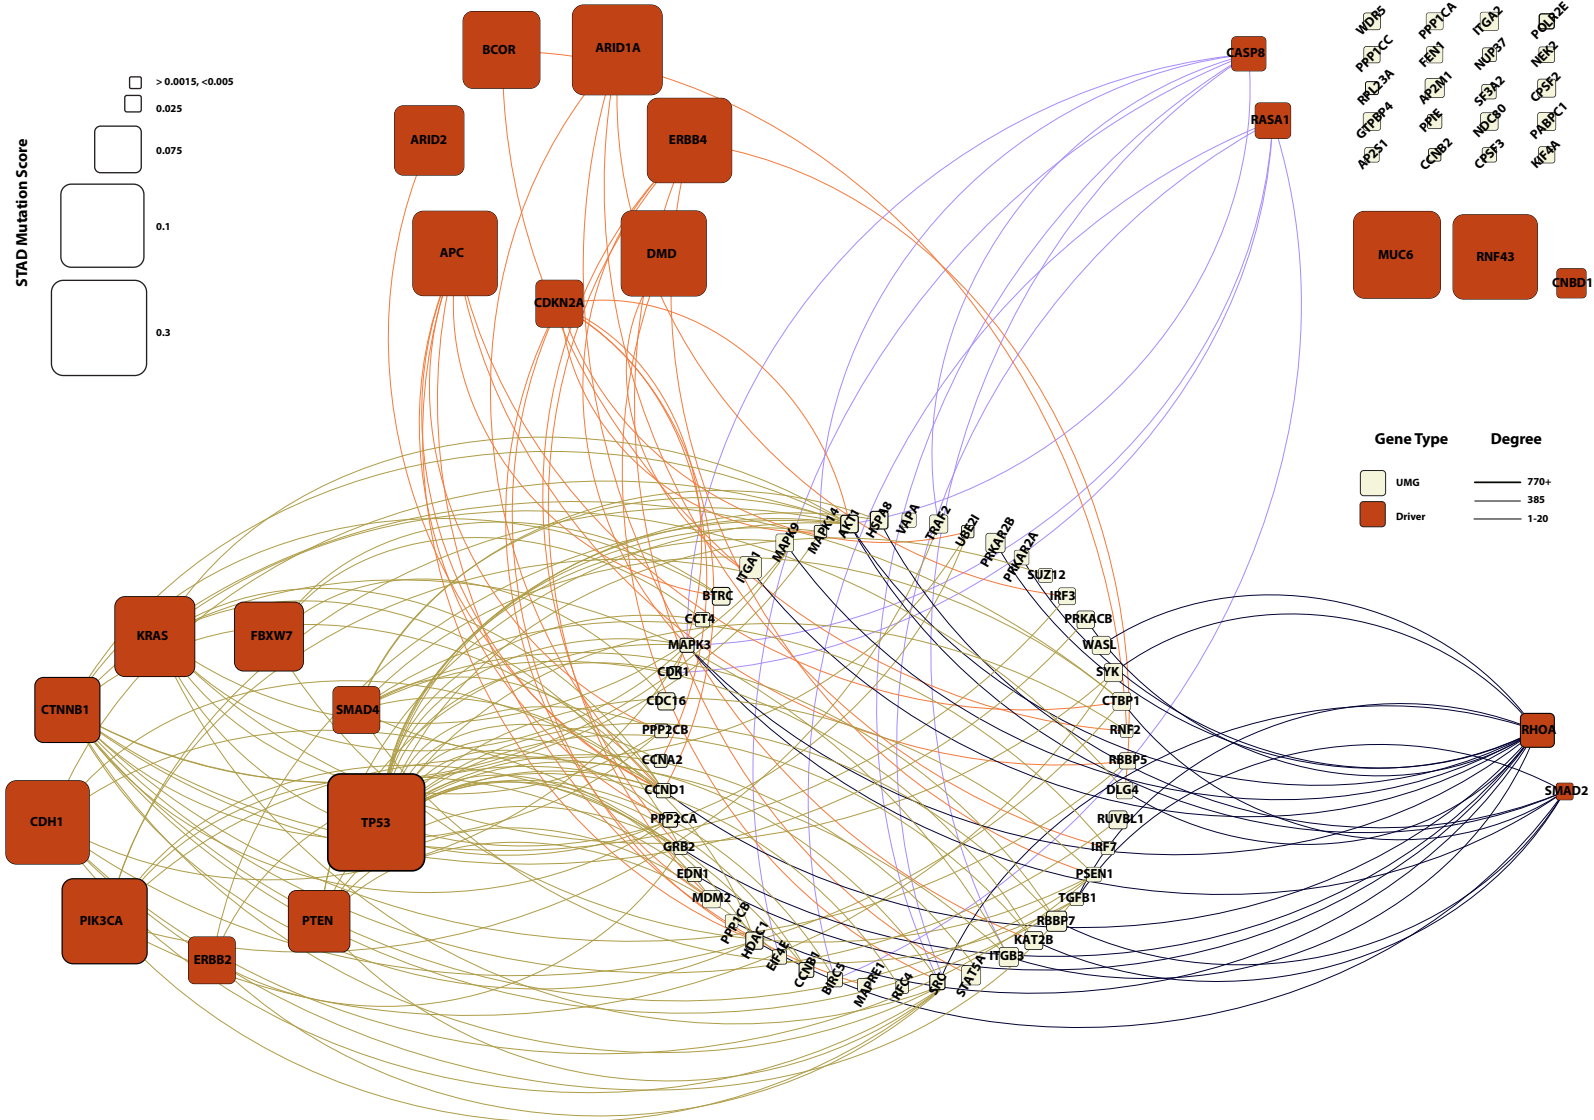

**Fig. S18** PPI network analysis of the relationships between UMGs (white nodes) and known driver genes (red) in THCA. Extension to Figure 5.

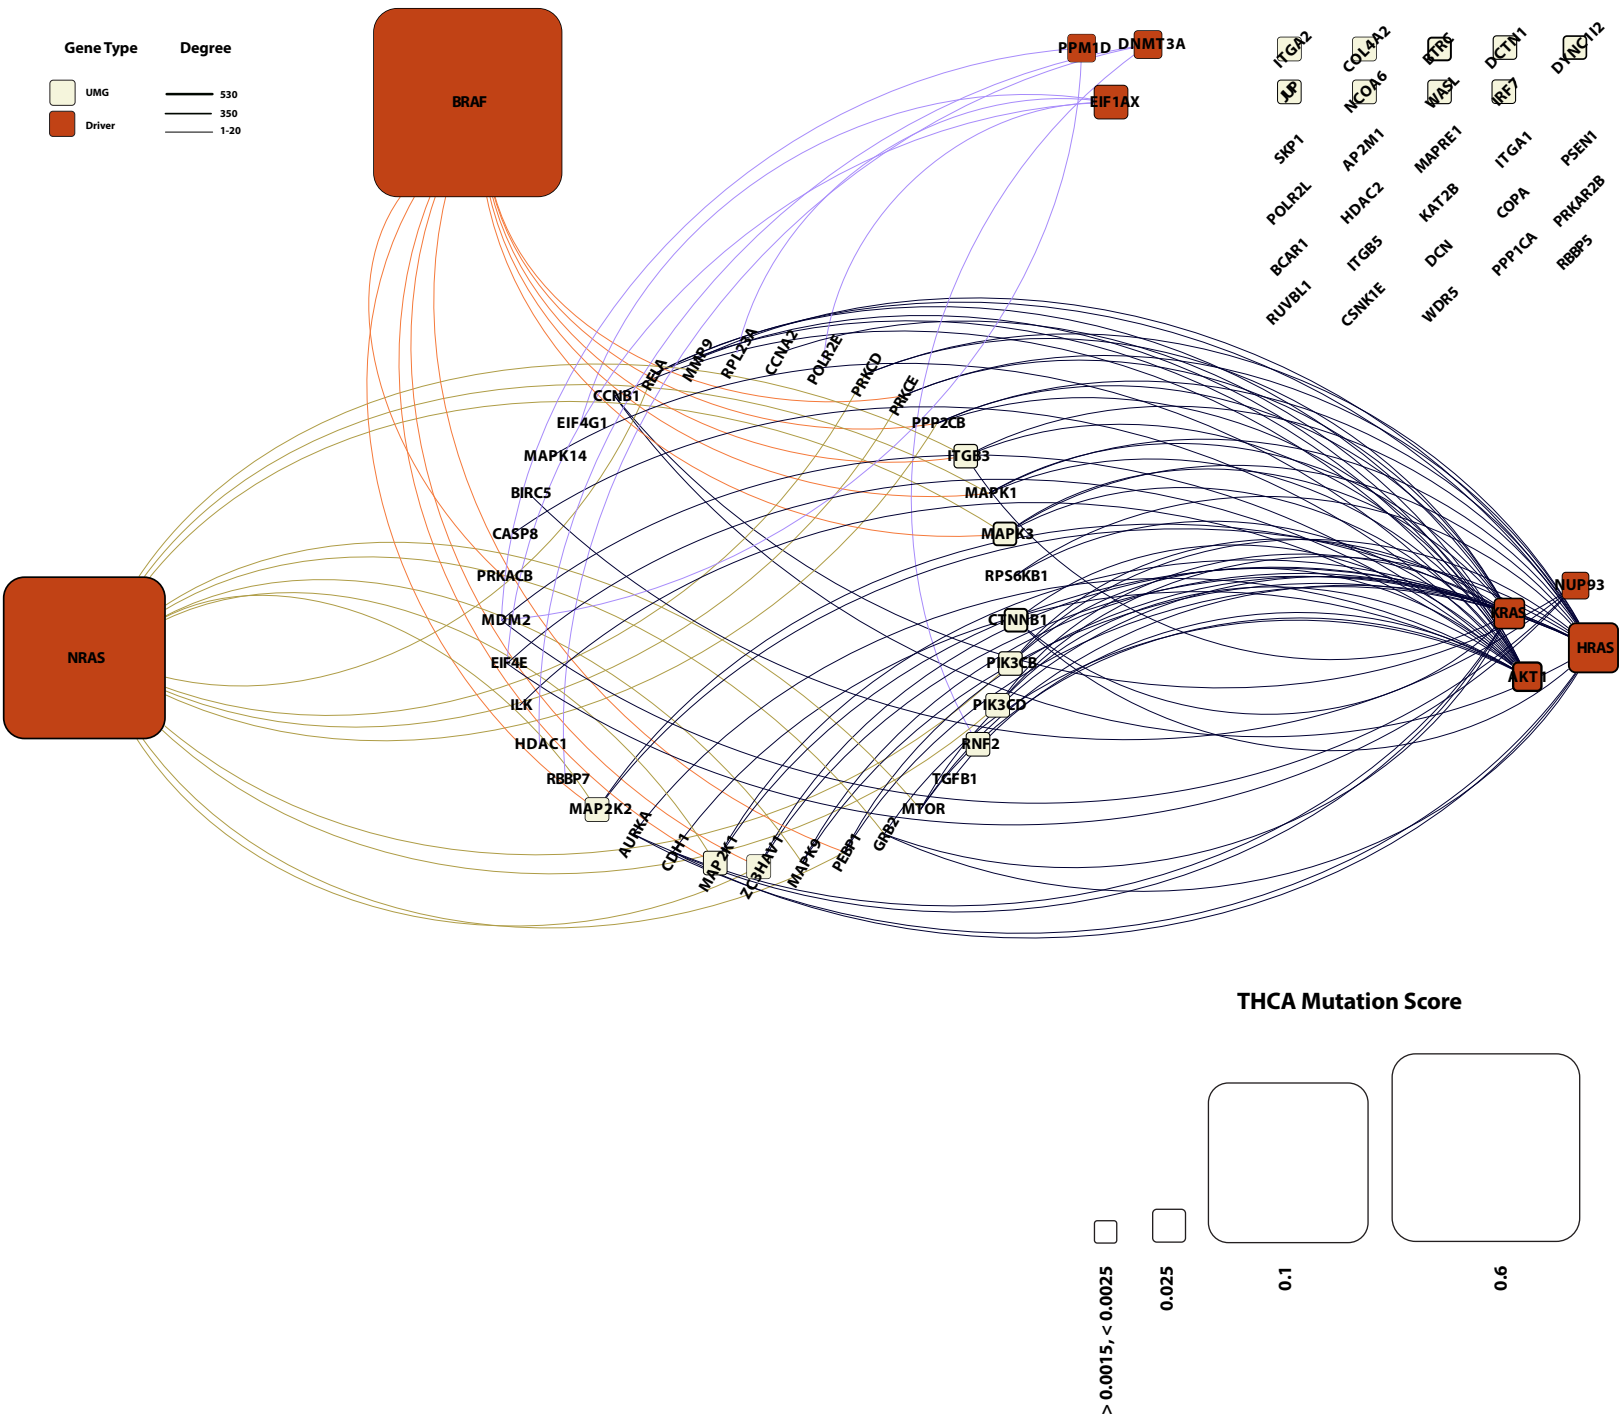

Supplement: MOESM5 [file 13059_2021_2504_MOESM5_ESM.pdf]
