# Supplementary material for: Network propagation-based prioritization of long tail genes in 17 cancer types
Source: Genome Biol. 2021 Oct 7;22:287. doi: 10.1186/s13059-021-02504-x (PMC8496153; doi:10.1186/s13059-021-02504-x)
Supplement: Supplementary file 1 — Additional file 1: Table S1. Cohort Size and number of PPI network nodes after expression-based filtering [file 13059_2021_2504_MOESM1_ESM.xlsx]

## Sheet: S1
	Number of Tumor Samples	Number of Nodes STRING	Number of Nodes HumanNetv2
BRCA	1018	12354	6818
CESC	291	12121	6719
CHOL	36	12339	6932
COAD	391	12132	6820
ESCA	185	12430	6912
HNSC	509	12260	6810
KICH	66	11647	6402
KIRC	369	12228	6749
KIRP	282	12126	6705
LIHC	365	11860	6673
LUAD	517	12571	6987
LUSC	485	12602	6983
PRAD	498	12239	6799
READ	139	12142	6825
STAD	439	12564	9373
THCA	500	12091	6679
UCEC	530	12472	6880
