# Supplementary material for: Network propagation-based prioritization of long tail genes in 17 cancer types
Source: Genome Biol. 2021 Oct 7;22:287. doi: 10.1186/s13059-021-02504-x (PMC8496153; doi:10.1186/s13059-021-02504-x)
Supplement: Supplementary file 2 — Additional file 2: Table S2. Statistical validation results of post-propagation rankings [file 13059_2021_2504_MOESM2_ESM.xlsx]

## Sheet: S2
Mann Whitney U (i.e. Wilcoxon Rank Sum) Test P-values (COSMIC genes enrichment towards higher ranks in post-propagation lists)
	STRING	HumanNetv2
BRCA	5.22e-58	4.44e-21
CESC	1.32e-52	1.11e-18
CHOL	3.88e-50	3.22e-13
COAD	3.69e-56	3.8e-21
ESCA	3.54e-56	3.32e-21
HNSC	1.16e-54	1.71e-19
KICH	2.27e-44	2.23e-06
KIRC	1.42e-52	4.2e-19
KIRP	5.22e-48	3.43e-14
LIHC	8.56e-54	3.42e-22
LUAD	9.67e-57	1.07e-18
LUSC	2.77e-54	9.6e-19
PRAD	1.52e-55	1.28e-19
READ	6.5e-53	2.24e-17
STAD	3.87e-56	2.63e-18
THCA	1.16e-52	6.55e-10
UCEC	1.33e-51	1.04e-14
