# Supplementary material for: Network propagation-based prioritization of long tail genes in 17 cancer types
Source: Genome Biol. 2021 Oct 7;22:287. doi: 10.1186/s13059-021-02504-x (PMC8496153; doi:10.1186/s13059-021-02504-x)
Supplement: Supplementary file 3 — Additional file 3: Table S3. Number of UMGs across cancer types and PPI networks [file 13059_2021_2504_MOESM3_ESM.xlsx]

## Sheet: S3
Number of Upward Mobility Genes (UMGs)
	STRING	HumanNetv2	STRING ∩ HumanNetv2	STRING ∩ HumanNetv2 DepMap-filtered
BRCA	527	304	69	62
CESC	576	350	91	83
CHOL	386	171	30	28
COAD	575	325	83	75
ESCA	566	344	72	69
HNSC	500	314	67	62
KICH	475	180	44	41
KIRC	361	299	54	47
KIRP	529	304	64	60
LIHC	512	302	60	56
LUAD	498	292	60	55
LUSC	546	317	79	70
PRAD	449	261	55	50
READ	605	390	80	71
STAD	554	302	74	67
THCA	663	370	74	64
UCEC	598	380	84	79
