# Supplementary material for: Network propagation-based prioritization of long tail genes in 17 cancer types
Source: Genome Biol. 2021 Oct 7;22:287. doi: 10.1186/s13059-021-02504-x (PMC8496153; doi:10.1186/s13059-021-02504-x)
Supplement: Supplementary file 4 — Additional file 4: Table S4. Statistical validation results of UMGs' negative impact on in vitro cancer cell line survival [file 13059_2021_2504_MOESM4_ESM.xlsx]

## Sheet: S4
Mann. Whitney U Test of DepMap percentage-based score distributions in UMG vs non-UMG gene sets. H0 = D(non-UMG) > D(UMG). The percentage-based score of a gene is a stringent estimate of the portion of cancer type-specific cell lines whose survival is negatively affected by its knockout (see Methods).
Mann Whitney U Test P-value (-ve CRISPR and RNAi-based scores in DepMap)
	STRING ∩ HumanNetv2 DepMap-filtered CRISPR	STRING ∩ HumanNetv2 DepMap-filtered RNAi
BRCA	6.67393e-11	9.99756e-12
CESC	1.01227e-09	6.71887e-10
CHOL	0.00120586	6.44707e-05
COAD	3.63647e-10	4.45722e-09
ESCA	0.000165201	3.38359e-07
HNSC	1.63366e-07	5.1007e-10
KICH	5.18094e-06	1.64109e-09
KIRC	1.60202e-11	1.83876e-11
KIRP	4.18798e-09	5.03153e-14
LIHC	9.1925e-06	8.10581e-08
LUAD	3.96897e-05	5.6786e-05
LUSC	5.29001e-07	2.27368e-07
PRAD	9.33362e-05	7.98691e-08
READ	1.8535e-05	1.39598e-13
STAD	3.4753e-08	8.12309e-11
THCA	6.86705e-05	2.75526e-18
UCEC	3.302e-09	3.42958e-12
