# Supplementary material for: Network propagation-based prioritization of long tail genes in 17 cancer types
Source: Genome Biol. 2021 Oct 7;22:287. doi: 10.1186/s13059-021-02504-x (PMC8496153; doi:10.1186/s13059-021-02504-x)
Supplement: Supplementary file 6 — Additional file 6: Table S5. Functional validation and text mining results associated with UMGs across cancer types [file 13059_2021_2504_MOESM6_ESM.xlsx]

## Sheet: S5
BRCA			CESC			CHOL			COAD			ESCA			HNSC			KICH			KIRC			KIRP			LIHC			LUAD			LUSC			PRAD			READ			STAD			THCA			UCEC
Gene	Citation Count (CancerMine)	Functional Verification	Gene	Citation Count (CancerMine)	Functional Verification	Gene	Citation Count (CancerMine)	Functional Verification	Gene	Citation Count (CancerMine)	Functional Verification	Gene	Citation Count (CancerMine)	Functional Verification	Gene	Citation Count (CancerMine)	Functional Verification	Gene	Citation Count (CancerMine)	Functional Verification	Gene	Citation Count (CancerMine)	Functional Verification	Gene	Citation Count (CancerMine)	Functional Verification	Gene	Citation Count (CancerMine)	Functional Verification	Gene	Citation Count (CancerMine)	Functional Verification	Gene	Citation Count (CancerMine)	Functional Verification	Gene	Citation Count (CancerMine)	Functional Verification	Gene	Citation Count (CancerMine)	Functional Verification	Gene	Citation Count (CancerMine)	Functional Verification	Gene	Citation Count (CancerMine)	Functional Verification	Gene	Citation Count (CancerMine)
MDM2	8	yes	WDR5	0	yes (indirect)	PPP1CA	0	yes	HDAC1	0	yes	MDM2	1	yes	MDM2	0	yes	MDM2	1	yes	SMARCD3	0	yes	WDR5	0	yes (indirect)	MDM2	1	yes	MDM2	3	yes	MDM2	3	yes	MDM2	5	yes	CTNNA1	0	yes	HDAC1	0	yes	ARAF	0	yes	HDAC1	0
WDR5	0	yes (indirect)	CCNA2	0	yes	PPP1CC	0	no	WDR5	0	yes (indirect)	WDR5	0	yes (indirect)	WDR5	0	yes (indirect)	GRB2	0	yes	CUL2	0	yes	HDAC1	0	yes	SH3KBP1	0	no	HDAC1	1	yes	SH3KBP1	0	no	WDR5	0	yes (indirect)	PRKACB	0	yes	CCNA2	0	yes	MAP2K1	0		CCNA2	0
PRKACB	0	yes	HDAC1	0	yes	EIF4E	0	yes	CCNA2	0	yes	PRKACB	0	yes	PRKACB	0	yes	HDAC1	0	yes	CCNA2	0	yes	SH3KBP1	0	no	PRKACB	0	yes	CCNA2	0	yes	WDR5	0	yes (indirect)	CCNA2	0	yes	CCNA2	0	yes	PRKACB	0	yes	MAPK1	2	yes	PRKACB	0
CCNA2	0	yes	PRKACB	0	yes	ITGA1	0	yes	SH3KBP1	0	no	HDAC1	0	yes	HDAC1	0	yes	DYNC1H1	0	yes	SMARCC1	0	yes	CCNA2	0	yes	CCNA2	0	yes	WDR5	0	yes (indirect)	PRKACB	0	yes	SH3KBP1	0	no	SH3KBP1	0	no	WDR5	1	yes (indirect)	MAPK3	0	yes	BTRC	0
PRKAR2B	0	yes	BTRC	0	yes	HDAC1	0	yes	PRKACB	0	yes	CCNA2	0	yes	CCNA2	0	yes	CCNA2	0	yes	HDAC1	0	yes	PPP2CB	0	no (PP2A is)	HDAC1	0	yes	PRKAR2B	0	yes	CCNA2	0	yes	PRKACB	0	yes	ITGA1	0	yes	BTRC	0	yes	PRKCE	0	no	PPP2CB	0
PPP2CB	0	no (PP2A is)	CUL5	0	yes	PRKACB	0	yes	MDM2	1	yes	PRKAR2B	0	yes	PRKAR2B	0	yes	PPP1CA	0	yes	ACTL6A	0	yes	AP2M1	0	no (prognostic marker)	WDR5	0	yes (indirect)	SYK	5	yes	HDAC1	1	yes	HDAC1	0	yes	PRKAR2B	0	yes	PRKAR2B	0	yes	RPS6KB1	0	yes	SYK	0
NUP37	0	yes	PRKAR2B	0	yes	WDR5	0	yes (indirect)	PRKAR2B	0	yes	ASH2L	0	yes	ASH2L	0	yes	WDR5	0	yes (indirect)	PRKAR2B	0	yes	PRKAR2B	0	yes	JUP	0	yes	GRB2	0	yes	PRKAR2B	0	yes	BTRC	0	yes	WDR5	0	yes (indirect)	MDM2	2	yes	WDR5	0	yes (indirect)	PRKAR2B	0
SYK	23	yes	ASH2L	0	yes	FGF2	0	yes	BTRC	0	yes	ITGA1	0	yes	PPP2CB	0	no (PP2A is)	PNPLA2	0	no	BTRC	0	yes	RBBP5	0	yes	SYK	0	yes	TYROBP	0	no	SYK	5	yes	PRKAR2B	1	yes	JUP	0	yes	ITGB3	0	yes	MAP2K2	0	yes	GRB2	0
PIK3R2	0	yes	PIK3CB	0	yes	SMARCA4	0	yes	ASH2L	0	yes	RBBP5	0	yes	RBBP5	0	yes	AP2M1	0	no (prognostic marker)	GRB2	0	yes	HGF	2	yes	CUL5	0	yes	PPP2CB	0	no (PP2A is)	BTRC	0	yes	RBBP5	0	yes	BTRC	0	yes	PPP2CB	0	no (PP2A is)	SH3KBP1	0	no	CCNB1	0
RBBP5	0	yes	RBBP5	0	yes	TRAF2	0	yes	SYK	0	yes	ITGB3	0	yes	ITGA1	0	yes	ANAPC4	0	yes	TOP2A	0	yes	PRKACB	0	yes	PPP2CB	0	no (PP2A is)	C4A	0	no	GRB2	0	yes	PPP1CA	0	yes	VCL	0	yes	PPP1CA	0	yes	HDAC1	0	yes	CCNB2	0
AP2M1	0	no (prognostic marker)	PPP2CB	0	no (PP2A is)	PSMC5	0	yes	PPP2CB	0	no (PP2A is)	GRB2	0	yes	CCNB1	0	yes	RBBP7	0	yes	AP2M1	0	no (prognostic marker)	RUVBL1	0	yes	GRB2	0	yes	CDH1	4	no (diagnostic marker)	BIRC5	2	yes	PPP2CB	0	no (PP2A is)	PPP2CB	0	no (PP2A is)	GRB2	0	yes	PRKCD	0	yes	AP2M1	0
ITGB3	0	yes	PPP1CA	0	yes	PRKAR2B	0	yes	GRB2	0	yes	CCNB1	0	yes	GRB2	0	yes	ITGA1	0	yes	CETN2	0	yes	SYK	0	yes	NUP37	1	yes	PSEN1	0	yes	PPP1CA	0	yes	AP2M1	0	no (prognostic marker)	GRB2	0	yes	CCNB1	0	yes	ITGB3	0	yes	RBBP4	0
GRB2	0	yes	GRB2	0	yes	CCNB1	0	yes	AP2M1	0	no (prognostic marker)	COL1A1	0	yes	RUVBL1	0	yes	CDC27	0	yes	CCNB1	0	yes	WASL	0	yes	PPP1CA	0	yes	RHOA	1	yes	PPP2CB	0	no (PP2A is)	ITGB3	0	yes	LAMC1	0	yes	ITGA1	0	yes	PRKACB	0	yes	PPP1CA	0
BUB1B	0	yes	RBBP7	0	yes	CTNNB1	0	yes	CCNB1	0	yes	CCNB2	0	yes	BTRC	0	yes	ERBB2	1	yes	CTNNB1	2	yes	GRB2	0	yes	CCNB1	0	yes	CASP8	0	yes	RBBP5	0	yes	GRB2	0	yes	AP2M1	0	no (prognostic marker)	AP2M1	0	no (prognostic marker)	CTNNB1	3	yes	RBBP5	0
CCNB2	2	yes	PIK3R3	0	yes	DYNC1H1	0	yes	PPP1CA	0	yes	PPP2CB	0	no (PP2A is)	PPP1CC	0	no	BIRC5	0	yes	BIRC5	0	yes	NUP37	0	yes	CASP8	0	yes	PPP1CA	0	yes	NUP37	0	yes	CCNB2	0	yes	CDK1	0	yes	RBBP7	0	yes	PPP2CB	0	no (PP2A is)	RUVBL1	0
CTNNB1	7	yes	SYK	0	yes	RFC4	0	yes	RBBP5	0	yes	SYK	0	yes	PPP1CA	0	yes	SKP1	0	yes	PPP2CB	0	no (PP2A is)	BIRC5	0	yes	BIRC5	4	yes	CDK1	0	yes	TOP2A	0	yes	RBBP4	0	yes	RUVBL1	0	yes	RUVBL1	0	yes	COL4A2	0	yes	CDK1	0
RBBP7	0	yes	RBBP4	0	yes	CDH1	0	no (diagnostic marker)	VCL	0	yes	PPP1CA	0	yes	RBBP4	0	yes	RBBP4	0	yes	CDK1	0	yes	BTRC	0	yes	CCNB2	0	yes	CCNB2	0	yes	AP2M1	0	no (prognostic marker)	RUVBL1	0	yes	BUB1B	0	yes	CCNB2	0	yes	GRB2	0	yes	NUP37	0
PPP1CA	0	yes	CCNB2	0	yes	TRAF6	0	yes	BUB1B	0	yes	CSNK1E	0	yes	CCNB2	0	yes	BUB1B	0	yes	NEK2	0	yes	CDH1	0	no (diagnostic marker)	MAPK14	1	yes	CCNB1	0	yes	C4A	0	no	KIF4A	0	yes	WASL	0	yes	PSEN1	0	yes	COL1A1	0	yes	PPP1CC	0
RBBP4	0	yes	PSEN1	0	yes	TUBB4B	0	yes	CCNB2	1	yes	RBBP4	0	yes	TPM1	0	yes	JAK2	0	yes	PPP1CA	0	yes	ITGB3	0	yes	RBBP7	0	yes	MAPK9	0	yes	ITGA5	0	yes	WASL	0	yes	CXCR4	0	yes	MAPK9	0	yes	PRKAR2B	0	yes	WASL	0
RUVBL1	0	yes	RUVBL1	0	yes	CREB1	0	yes	RBBP4	0	yes	WASL	0	yes	PIK3R3	0	yes	TOP2A	0	yes	RUVBL1	0	yes	RBBP7	0	yes	SMARCD3	0	yes	STAT5A	0	yes	AGT	0	yes	CASP8	0	yes	CCNB2	0	yes	RBBP5	0	yes	EIF4E	0	yes	CPSF3	0
CDK1	4	yes	PPP1CC	0	no	ITGB3	0	yes	RUVBL1	0	yes	MAPK9	0	yes	MAPRE1	0	yes	ANAPC7	0	no	PPP1CC	0	no	SMARCD3	0	yes	RUVBL1	0	yes	RBBP5	0	yes	CCNB2	0	yes	RBBP7	0	yes	COL1A1	0	yes	SYK	4	yes	CCNA2	0	yes	EIF4E	0
WASL	0	yes	AP2S1	0	no	PPP2CB	0	no (PP2A is)	CDK1	0	yes	BIRC5	0	yes	CDH1	0	no (diagnostic marker)	CCNB1	0	yes	RBBP4	0	yes	EIF4E	0	yes	PPP1CC	0	no	TIMP1	0	yes	PPL	0	yes	NEK2	0	yes	SF3A2	0	no	PPP1CC	0	no	ZC3HAV1	0	yes	ANAPC4	0
CDH2	1	yes	CCNB1	0	yes	RHOA	0	yes	PIK3CB	1	yes	CDH1	0	no (diagnostic marker)	MAPK9	0	yes	SOS1	0	yes	RHOA	1	yes	AP2S1	0	no	ITGAX	0	yes	DCN	1	yes	CDH1	4	no (diagnostic marker)	CDK1	1	yes	ASH2L	0	yes	KIF4A	1	yes	CDH1	0	no (diagnostic marker)	FEN1	0
VAPA	0	no (but fusion protein)	CPSF3	0	yes	LAMC1	0	yes	RHOA	1	yes	COL4A1	0	yes	TYROBP	0	no	FZR1	0	yes	RBBP7	0	yes	MAPK14	0	yes	C4A	0	no	RBBP7	0	yes	CTNNB1	1	yes	HSPA5	0	yes	PPP1CA	0	yes	EDN1	0	yes	RBBP5	0	yes	CDC27	0
NEK2	1	yes	MAPK14	0	yes	AKT1	0	yes	C4A	0	no	NRP1	0	yes	CDK1	0	yes	ILK	0	yes	EIF4E	0	yes	CASP8	0	yes	FEN1	0	yes	IRF7	0	yes	TYROBP	0	no	AP2S1	0	no	NEK2	0	yes	CTBP1	0	yes	LAMC1	0	yes	HDAC2	0
EIF4E	3	yes	ITGB3	0	yes	POLR2E	0	no	PPP1CC	0	no	FKBP1A	0	yes	PSEN1	0	yes	LAMC1	0	yes	ITGB3	0	yes	RBBP4	0	yes	BUB1B	0	yes	RBBP4	0	yes	PSEN1	0	yes	EIF4E	2	yes	CCNB1	0	yes	CDK1	0	yes	MTOR	0	yes	RFC4	0
TFDP1	1	yes	CDK1	0	yes	RBBP5	0	yes	VAPA	0	no (but fusion protein)	PIK3R3	0	yes	BIRC5	0	yes	EGFR	2	yes	CASP8	0	yes	CCNB2	0	yes	CDK1	0	yes	VAPA	1	no (but fusion protein)	RBBP7	0	yes	PPP1CC	0	no	PSEN1	0	yes	EIF4E	0	yes	WASL	0	yes	TPX2	0
MAPK9	1	yes	EIF4E	0	yes	RUVBL1	0	yes	TPX2	1	yes	RUVBL1	0	yes	WASL	0	yes	ITGAL	0	no	NUP107	0	yes	NEK2	0	yes	RHOA	0	yes	NEK2	0	yes	STAT5A	0	yes	KAT2B	0	yes	RBBP4	0	yes	NUP37	0	yes	ITGA1	0	yes	PSEN1	0
HDAC2	1	yes	NUP37	0	yes	CCNB2	0	yes	CPSF3	0	yes	VAPA	0	no (but fusion protein)	IRF7	0	yes	PRKACB	0	yes	NCOA1	0	yes	CDK1	0	yes	VAPA	0	no (but fusion protein)	NUP37	0	yes	CDK1	0	yes	VEGFA	0	yes	VAPA	0	no (but fusion protein)	VAPA	0	no (but fusion protein)	BIRC5	0	yes	MDM2	2
FGFR1OP	0	yes	TPX2	0	yes	MAP3K7	0	yes	EIF4E	0	yes	TRAF2	0	yes	NUP37	0	yes	BTRC	0	yes	AP2S1	0	no	CCNB1	0	yes	DCTN1	0	no	VEGFA	3	yes	RBBP4	0	yes	SRC	8	yes	PPP1CC	0	no	WASL	0	yes	PIK3CB	0	yes	MAPK9	0
SRC	29	yes	NEK2	0	yes				NEK2	0	yes	ITGAL	0	no	EIF4E	2	yes	COL1A2	0	yes	GDI1	0	yes	P4HB	0	yes	MAPRE1	0	yes	EIF4E	0	yes	VEGFA	3	yes	PPP1CB	0	yes	RHOA	0	yes	BIRC5	1	yes	ITGAM	0	yes	P4HB	0
FEN1	0	yes	JUP	0	yes				PSEN1	0	yes	MAPRE1	0	yes	VAPA	0	no (but fusion protein)	CDC16	0	yes	MAPRE1	0	yes	RFC4	0	yes	CPSF3	0	yes	DLG1	0	yes	MAPRE1	0	yes	CSNK1E	0	yes	SMC1A	0	yes	SRC	4	yes	PIK3CD	0	yes	VAPA	0
PPP1CC	0	no	NUP133	0	no				SRC	8	yes	SF3A2	0	no	TGFB1	0	yes	CASP3	0	yes	VCP	0	yes	AP2B1	0	yes	KIF4A	1	yes	FGG	0	yes	VAPA	1	no (but fusion protein)	PPIE	0	no	FEN1	0	yes	NEK2	1	yes	MAPRE1	0	yes	TRAF2	0
CSNK1E	0	yes	SMC3	0	yes				HDAC2	0	yes	JUP	1	yes	NEK2	0	yes	ITGA4	0	yes	HDAC2	0	yes	UBE2I	0	yes	AP2S1	0	no	ITGB1	2	yes	EIF4E	0	yes	PIK3R3	0	yes	HDAC2	0	yes	GTPBP4	0	yes	PIK3R3	0	yes	CTNNA1	0
RNF2	0	yes	KEAP1	0	yes				SUZ12	0	yes	CDK1	0	yes	AP2S1	0	no	KAT2B	0	yes	HGF	1	yes	BUB1B	0	yes	NUP107	0	yes	ITGB5	0	yes	PPP1CC	0	no	DLG1	0	yes	CPSF3	0	yes	HDAC2	0	yes	IRF7	0	yes	PPP2CA	0
CDC16	0	yes	HSPA5	0	yes				FEN1	0	yes	SRC	0	yes	HDAC2	0	yes	RAB1A	0	yes	P4HB	0	yes	TPX2	0	yes	BCAR1	0	no (strong association)	SF3A2	0	no	NEK2	0	yes	KIF3A	0	yes	BCAR1	0	no (strong association)	CPSF3	0	yes	MDM2	2	yes	BIRC5	0
CETN2	0	yes	WASL	0	yes				SF3A2	0	no	KIF20A	0	yes	SRC	2	yes	MAPRE1	0	yes	FEN1	0	yes	RHOA	1	yes	SUZ12	1	yes	SRC	4	yes	CPSF3	0	yes	ANAPC7	0	no	TPX2	0	yes	IRF7	0	yes	DCTN1	0	no	RHOA	0
CXCR4	4	yes	SF3A2	0	no				P4HB	0	yes	AP2M1	0	no (prognostic marker)	TPX2	0	yes	CCNB2	0	yes	MEN1	0	yes	HDAC2	0	yes	CCND1	2	yes	CXCR4	5	yes	MAPK9	0	yes	CXCR4	0	yes	PRKCA	0	yes	KAT2B	0	yes	ITGA5	0	yes	CASP3	0
NCAPG	0	yes	ITGA5	0	yes				RFC4	0	yes	NEK2	0	yes	CASP3	0	yes	CSNK1E	0	yes	UPF3B	0	no	PPIE	0	no	EIF4E	0	yes	NCAPG	0	yes	SRC	4	yes	CASP3	0	yes	NCOA1	0	yes	TGFB1	0	yes	BTRC	0	yes	AP2S1	0
MAPRE1	1	yes	HDAC2	0	yes				AP2S1	0	no	FEN1	0	yes	RAC2	0	yes	RELA	0	yes	B9D2	0	no	SRC	5	yes	PIK3R3	0	yes	MAPK14	0	yes	RHOA	0	yes	P4HB	0	yes	RBBP5	0	yes	FEN1	0	yes	PPP1CA	0	yes	KIF20A	0
MAPK14	5	yes	FEN1	0	yes				TGFB1	1	yes	NUP37	0	yes	ITGB5	0	yes	MAPK3	0	yes	UBE2I	0	yes	HSPA5	0	yes	MAPK3	0	yes	PPP1CC	0	no	RACGAP1	0	yes	CCND1	4	yes	KEAP1	0	yes	TRAF2	0	yes	RBBP7	0	yes	CSTF3	0
PRKAR2A	0	yes	CDC16	0	yes				NUP37	0	yes	SMC3	0	yes	CCND1	2	yes	EIF4E	0	yes	SF3A2	0	no	NUP107	0	yes	VEGFA	2	yes	BIRC5	2	yes	IRF7	0	yes	CDC26	0	no	PPP2CA	0	yes	SF3A2	0	no	GOT1	0	yes	SRC	1
IRF7	0	yes	BCAR1	0	no (strong association)				RNF2	0	yes	MAPK3	0	yes	DYNC1LI1	0	no	CETN2	0	yes	RFC5	0	no	PLCG1	0	yes	UBE2I	0	yes	TGFB1	0	yes	TPX2	1	yes	SMC1A	0	yes	PLCG1	0	yes	PABPC1	2	yes	DYNC1LI1	0	no	IRF7	0
SF3A2	0	no	MAPRE1	0	yes				PIK3R3	0	yes	HDAC2	0	yes	PRKAR2A	0	yes	NCAPG	0	yes	KLHL2	0	yes	PPP1CC	0	no	P4HB	0	yes	TRAF6	12	yes	DLG3	0	no	POLR2E	0	no	EIF4E	0	yes	STAT5A	0	yes	ITGB5	0	yes	CXCR4	0
RFC4	0	yes	KAT2B	0	yes				IRF7	0	yes	EIF4G1	0	yes	SUZ12	1	yes				RPL23A	0	yes	MAPRE1	0	yes	TIMP1	0	yes	NDC80	0	yes	RAC2	0	yes	MAPK14	0	yes	TGFB1	0	yes	SUZ12	0	yes	DYNC1I2	0	no	NDC80	1
AP2S1	0	no	POLR2E	0	no				CXCR4	0	yes	JAK2	0	yes	NUP107	0	yes				BARD1	0	yes	AURKA	0	yes	MMP9	0	yes	RNF2	0	yes	SEC13	0	no	PPP2R1A	0	yes	NUP37	0	yes	AKT1	7	yes	MAPK9	0	yes	PES1	0
P4HB	0	yes	SUZ12	0	yes				TRAF6	0	yes	STAT5A	0	yes	DYNC1I2	0	no				ANAPC7	0	no	AKT1	2	yes	IKBKG	0	no	KIF15	0	yes	TIMP1	0	yes	PRKAR2A	0	yes	CASP3	0	yes	CCND1	8	yes	PSEN1	0	yes	POLR2E	0
CPSF2	0	yes	MMP9	0	yes				HSPA5	0	yes	EIF4E	0	yes	HIF1A	0	yes				PLCG2	0	yes	POLR2E	0	no	PAK2	0	yes	MAPRE1	0	yes	P4HB	0	yes	CREB1	1	yes	MCM2	0	yes	TIMP1	0	yes	JUP	0	yes	PIK3R3	0
POLR2E	0	no	ANAPC4	0	yes				PRKCA	0	yes	SMC1A	0	yes	MAPK14	0	yes				BMP2	0	yes	NUP153	0	yes	PRKAR2A	0	yes	RAC2	0	yes	COL18A1	0	no (but its cleavage product endostatin is)	SMC3	0	yes	JAK3	0	yes	AP2S1	0	no	RNF2	0	yes	FZR1	0
MCM2	0	yes	P4HB	0	yes				TIMP1	0	yes	SLC9A1	0	yes	TFDP1	0	yes				CDC26	0	no	GDI1	0	yes	RNF2	0	yes	PRKAR2A	0	yes	TRAF6	12	yes	SEC13	0	no	HSPA5	0	yes	POLR2E	0	no	AP2M1	0	no (prognostic marker)	RNF2	0
UBE2I	0	yes	NUP107	0	yes				NDC80	0	yes	BMP2	0	yes	MMP9	0	yes				MDM2	1	yes	PPP2CA	0	yes	KLHL3	0	no	BMP2	0	yes	GDI1	0	yes	IRF7	0	yes	DDX58	0	yes	HSPA8	0	yes	CASP8	0	yes	PPIE	0
CCND1	65	yes	CPSF2	0	yes				MAPK14	0	yes	PRKCA	0	yes	RNF2	0	yes				SIN3A	0	yes	SKP1	0	yes	KPNB1	0	yes	IRF3	0	yes	HDAC2	3	yes	RNF2	0	yes	PRKAR2A	0	yes	PIK3R3	0	yes	ITGA2	0	yes	MAPK14	0
PPP2CA	0	yes	CDH1	0	no (diagnostic marker)				PPIE	0	no	PPP1CC	0	no	NCAPG	0	yes				POLR2E	0	no	RNF2	0	yes	DYNC1I2	0	no	MAPK3	0	yes	TGFB1	0	yes	RFC4	0	yes	VCP	0	yes	IRF3	0	yes	NCOA6	0	yes	AKT1	1
PPIE	0	no	CTBP1	0	yes				CASP3	0	yes	CASP3	0	yes	POLR2E	0	no				HSPA2	0	yes	RPS23	0	yes	NDC80	0	yes	SKP1	0	yes	PRKAR2A	0	yes	STAG2	0	yes	PIK3R3	0	yes	UBE2I	0	yes	BCAR1	0	no (strong association)	UBE2I	0
BIRC5	3	yes	RUVBL2	0	yes				MAPRE1	1	yes	CCND1	3	yes	PRKCE	0	no							SF3A2	0	no	CDK2	0	yes	BMP4	0	yes	PLCG1	0	yes	SIN3A	0	yes	MAP3K7	0	yes	PPP2CA	0	yes	EIF4G1	0	yes	CETN2	0
PSEN1	0	yes	IRF4	0	yes				POLR2E	0	no	TGFB1	0	yes	DHX15	0	yes							RACGAP1	0	yes	BMP2	0	yes	IKBKG	0	no	CDK4	3	yes				BMP2	0	yes	NDC80	0	yes	KAT2B	0	yes	SF3A2	0
DSN1	1	yes	RNF2	0	yes				ITGB5	0	yes	IKBKB	0	yes	RPL23A	0	yes							VEGFA	3	yes	CYP3A4	0	yes	CETN2	0	yes	VHL	1	yes				AP2S1	0	no	MAPK14	0	yes	SKP1	0	yes	TRAF6	0
DYNC1LI1	0	no	RFC4	0	yes				MCM2	0	yes	AP2S1	0	no	SMC1A	0	yes							GAPDH	0	yes	ITGB1	1	yes	POLR2E	0	no	MAP3K7	1	yes				MTOR	0	yes	MAPK3	0	yes	PEBP1	0	yes	MAPK3	0
TRAF2	1	yes	PPIE	0	no				IKBKB	0	yes	MEN1	0	yes	KIF20A	0	yes							PRPF3	0	yes	MEN1	0	yes	CSNK1E	0	yes	CDC16	0	yes				TIMP1	0	yes	RNF2	0	yes	TGFB1	0	yes	SEC13	0
FZR1	0	yes	UBE2I	0	yes				BIRC5	0	yes	IKBKG	0	no	UBE2I	0	yes							SYNJ1	0	no	CUL3	0	yes	HSPA5	0	yes	CASP3	1	yes				RFC4	0	yes	ITGA2	0	yes	MAPK14	0	yes	EED	0
DYNC1LI2	0	no	BARD1	0	yes				GDI1	0	yes	MAPK8	0	yes	VEGFA	0	yes							CXCR4	3	yes							ITGB5	0	yes				EXO1	0	yes	HSPA4	0	yes	AURKA	0	yes	PSMC1	0
FGF2	2	yes	NCAPG	0	yes				CPSF2	0	yes	EDN1	0	yes	NDC80	0	yes							VAPA	0	no (but fusion protein)							POLR2E	0	no				BIRC5	0	yes	PPIE	0	no	ILK	0	yes	CCNA1	0
SKP1	0	yes	PPP2CA	0	yes				MAPK9	0	yes	POLR2E	0	no	EED	0	yes							ANAPC4	0	yes							AP2S1	0	no				P4HB	0	yes	CASP3	0	yes	COPA	0	yes	ANAPC7	0
BECN1	8	yes	DYNC1LI2	0	no				MAPK3	0	yes	CDK4	2	yes	IKBKG	0	no							NCAPG	0	yes							NGF	0	yes				MAPK14	0	yes	PRKAR2A	0	yes	RUVBL1	0	yes	RFC5	0
SYT1	0	yes	SRC	0	yes				FZR1	0	yes	IRF7	0	yes	SEC13	0	no																DYNC1LI1	0	no				BECN1	0	yes	CPSF2	0	yes	POLR2E	0	no	CDC23	0
CASP3	0	yes	EED	0	yes				RAC2	0	yes	RNF2	0	yes	PPP2CA	0	yes																PIK3R3	1	yes				RAB1A	0	yes	CXCR4	0	yes	RELA	1	yes	RAB1A	0
TGFB1	3	yes	MAPK3	0	yes				MEN1	0	yes	NGF	0	yes	VHL	0	yes																CFP	0	yes				FGFR1OP	0	yes	CDC16	0	yes	CSNK1E	0	yes	BECN1	0
CDC23	0	yes	PPP1CB	0	yes				EED	0	yes	BMP4	0	yes																			UBE2I	0	yes				UBE2I	0	yes	MAPRE1	0	yes	DCN	0	yes	IKBKG	0
PSMC5	0	yes	BECN1	0	yes				DCN	1	yes	PSMC5	0	yes																			VCP	0	yes				KIF20A	0	yes	MAPK8	1	yes	RAB1A	0	yes	PSMC3	0
			TRAF6	0	yes				PPP1CB	0	yes	MAPK14	0	yes																			MAPK8	3	yes				NCAPG	0	yes	PPP1CB	0	yes	POLR2L	0	no	TGFB1	0
	Removed after DepMap Filtering		MAP3K7	0	yes				DYNC1LI1	0	no	PRKAR2A	0	yes																			BMP2	0	yes				CCT4	0	no	DLG4	0	no	CCNB1	0	yes	CCT4	0
			EZH2	0	yes				EDN1	0	yes	SEC13	0	no																			MAPK14	0	yes				CDC27	0	yes	RPL23A	0	yes	MMP9	0	yes	VEGFA	0
			STAT5A	0	yes				IRF4	0	yes																						RNF2	0	yes				POLR2E	0	no	RFC4	0	yes	RPL23A	0	yes	PSMC2	0
			MDM2	1	yes				PPP2CA	0	yes																						KPNB1	0	yes				NDC80	0	yes	CCT4	0	no	HDAC2	0	yes	DSN1	0
			IKBKB	0	yes				IKBKG	0	no																						FZR1	0	yes				SRC	0	yes							CDC26	0
			KIF20A	0	yes				RAB1A	0	yes																						CSNK1E	0	yes				TRAF2	0	yes							AP2B1	0
			RPL23A	0	yes				UBE2I	0	yes																						EED	0	yes				MAPRE1	0	yes							SKP1	0
			PRKAR2A	0	yes				VEGFA	1	yes																						CCND1	16	yes				IRF7	0	yes							CSNK1E	0
			DYNC1I2	0	no				SKP1	0	yes																						BECN1	1	yes				CUL3	0	yes							PRKCA	0
			SNRPA1	0	yes				AURKA	0	yes																												CCND1	0	yes							IRF3	0
			RAB1A	0	yes				HSPA4	0	yes																																					PRKAR2A	0
			IKBKG	0	no				MAP3K7	0	yes																																					SH3GL2	0
			TGFB1	1	yes				CCND1	4	yes																																					RPL23A	0
			CCND1	0	yes																																											CPSF4	0
			CDC23	0	yes
			IRF3	0	yes
			DSN1	0	yes
			CUL3	0	yes
			SEC13	0	no
			KIF3A	0	yes
			CASP3	0	yes
[truncated: 1 more columns]
