# Supplementary material for: Network propagation-based prioritization of long tail genes in 17 cancer types
Source: Genome Biol. 2021 Oct 7;22:287. doi: 10.1186/s13059-021-02504-x (PMC8496153; doi:10.1186/s13059-021-02504-x)
Supplement: Supplementary file 7 — Additional file 7: Table S6. Results of in vitro experiments [file 13059_2021_2504_MOESM7_ESM.xlsx]

## Sheet: S6
Gene Symbol	MD231 % Effect rep 1	MD231 % Effect rep 2	MD231 % Effect rep 3	MD231 ave	MD231 STD	MD468 % Effect rep 1	MD468 % Effect rep 2	MD468 % Effect rep 3	MD468 ave	MD468 STD	HCC % Effect rep 1	HCC % Effect rep 2	HCC % Effect rep 3	HCC1187 ave	HCC1187 STD	BT549 % Effect rep 1	BT549 % Effect rep 2	BT549 % Effect rep 3	BT549 ave	BT549 STD	H460 % Effect rep 1	H460 % Effect rep 2	H460 % Effect rep 3	H460 ave	H460 STD	DU145 % Effect rep 1	DU145 % Effect rep 2	DU145 % Effect rep 3	DU145 ave	DU145 STD	HCC1299% Effect rep 1	HCC1299% Effect rep 2	HCC1299% Effect rep 3	HCC1299 AVE	HCC1299 STD
NUP133	-43.6958	-31.5492	-79.2852	-51.5101	24.8088	9.4817	12.1117	4.42708	8.6735	3.90555	-22.1457	-16.675	-37.4023	-25.4077	10.7418	-28.9581	-59.2372	-59.8608	-49.352	17.6644	27.3041	19.7444	9.44439	18.831	8.96483	-14.6753	-15.7567	-21.1434	-17.1918	3.46464	-25.875	-2.14882	-7.79659	-11.9402	12.394
PNPLA2	-7.12161	-30.2361	-60.722	-32.6932	26.8846	33.7801	13.469	-4.17585	14.3578	18.9936	36.5615	-36.9734	-60.2436	-20.2185	50.5307	11.0413	-3.36542	0.356793	2.67755	7.47849	14.018	-12.8982	-5.75055	-1.54359	13.9425	-5.44552	-4.34808	-5.24453	-5.01271	0.584296	-32.1914	-27.6787	-65.2911	-41.7204	20.5371
DCTN1	-8.04678	-22.954	-41.0099	-24.0036	16.5066	20.481	13.759	1.48291	11.9077	9.63343	55.3895	60.1424	52.0239	55.8519	4.07897	31.4717	27.3895	33.9403	30.9338	3.30838	47.9231	21.2072	38.534	35.8881	13.553	-11.0252	-4.36014	-9.0675	-8.15095	3.42576	15.4979	-9.56544	-14.6282	-2.8986	16.1317
SYNJ1	-25.5356	-14.6275	-61.0503	-33.7378	24.274	7.32694	16.3487	-13.9548	3.24028	15.5596	-22.1588	-15.0469	-62.0643	-33.09	25.3432	-5.19117	-1.32753	-20.7808	-9.09982	10.2988	21.3055	17.5181	13.3036	17.3757	4.00285	-4.58123	-26.5141	-21.2841	-17.4598	11.4556	33.9524	6.71631	-20.8262	6.61417	27.3894
KLHL3	4.3237	-24.3866	-59.1552	-26.406	31.7876	4.07668	4.29014	-8.67064	-0.101277	7.42206	-5.47973	-13.165	-51.1885	-23.2777	24.475	-5.03046	-10.4498	-9.11911	-8.1998	2.82423	37.8158	37.0863	17.2119	30.7047	11.6908	-6.95702	-26.2608	-16.0783	-16.432	9.65676	-20.4849	-33.4101	-36.0633	-29.9861	8.33451
DLG3	6.11436	-22.7153	-24.6104	-13.7371	17.218	19.3614	20.7549	-1.17127	12.9817	12.2766	-20.6139	-22.2857	-25.078	-22.6592	2.25536	34.2103	29.9738	15.5349	26.573	9.79113	64.7736	63.4393	66.6371	64.95	1.60615	5.07468	2.24464	-1.2688	2.01684	3.17787	-7.75481	-23.6675	-23.2914	-18.2379	9.08057
DLG4	-32.2207	-21.5812	-21.2827	-25.0282	6.23066	-6.53199	11.9707	-8.52968	-1.03031	11.3035	-19.8917	-38.4308	-33.9755	-30.766	9.6773	-20.575	-63.3452	-60.8637	-48.2613	24.0091	-4.67329	-24.2982	-18.9157	-15.9624	10.1403	-10.9569	-15.411	-7.06556	-11.1445	4.17587	0.281605	-7.8523	-15.8887	-7.81981	8.08521
POLR2L	49.9408	50.9256	53.7758	51.5474	1.99167	39.2295	43.2007	39.1932	40.5411	2.30331	18.3419	13.0638	-21.2397	3.38864	21.4914	61.8666	59.2822	57.7586	59.6358	2.07667	92.6121	89.6562	89.3803	90.5495	1.79152	30.7059	37.982	40.816	36.5013	5.21519	47.0028	49.482	44.3705	46.9518	2.55616
PSMC3	17.7984	33.8099	27.6172	26.4085	8.07389	22.2169	37.0868	24.0696	27.7911	8.10341	9.64129	-4.67006	-28.0453	-7.69135	19.0241	29.2988	31.9603	23.1658	28.1416	4.50998	72.0195	69.6042	76.064	72.5626	3.26393	18.1114	21.6168	24.3101	21.3461	3.10823	27.4202	37.9079	34.9064	33.4115	5.40132
PRKCE	-19.4324	8.8302	-52.1269	-20.9097	30.5054	6.4167	-0.00327242	-25.9208	-6.50246	17.1204	-6.58262	-24.3777	-16.5962	-15.8522	8.92084	27.5373	27.8459	14.3971	23.2601	7.67716	31.9193	14.1541	24.7187	23.5973	8.93554	10.7147	9.34387	16.2944	12.1176	3.68152	11.7513	13.1858	-19.0295	1.96921	18.1995
DYNC1LI1	-19.5965	-65.4971	-10.5388	-31.8775	29.4656	-3.15687	-0.34159	-29.4329	-10.9771	16.045	-35.2841	-50.4839	-62.3794	-49.3824	13.5812	-8.39909	-23.3844	-15.9271	-15.9035	7.49267	3.40799	-41.4095	6.89678	-10.3682	26.9391	-13.8834	-14.5025	-6.98516	-11.7903	4.1729	-25.6034	-30.7359	-66.6421	-40.9938	22.3598
RFC5	53.6862	-12.598	7.36782	16.152	34.004	0.238383	15.9863	2.06288	6.09584	8.61379	13.4051	-9.42738	-28.5048	-8.17569	20.983	-2.73541	-83.1327	7.40265	-26.1552	49.6037	45.4397	35.3665	53.9784	44.9282	9.31649	-1.98033	-6.0847	-4.86665	-4.31056	2.10793		13.0535	48.6812	30.8673	25.1925
DYNC1I2	18.1267	-48.7097	-9.31517	-13.2994	33.5959	10.6135	5.87701	1.84136	6.11061	4.39071	-7.06842	-24.1239	-43.9934	-25.0619	18.4804	27.7495	20.8129	22.9858	23.8494	3.548	55.358	55.8267	59.1492	56.778	2.06686	-1.36126	-11.1941	6.97612	-1.85973	9.09534	89.6641	49.3984	26.1806	55.081	32.121
TYROBP	39.167	-36.4138	-57.0661	-18.1043	50.6619	19.1962	19.7843	8.6641	15.8815	6.2574	-2.15354	-34.9471	-45.1138	-27.4048	22.4513	28.7009	11.6713	23.7315	21.3679	8.7574	10.2117	19.3627	34.2779	21.2841	12.1476	-0.97132	-15.4753	-7.355	-7.93387	7.2693	15.9157	-4.76727	-40.374	-9.74186	28.4727
ANAPC7	7.17383	-38.0105	-16.5077	-15.7814	22.6009	0.753914	9.00644	-29.4288	-6.55616	20.2335	30.6969	2.07859	-27.6689	1.70221	29.1847	17.2514	34.0753	32.0246	27.7838	9.17874	49.8848	47.8437	33.0457	43.5914	9.18972	-0.348228	-9.91169	-2.26172	-4.17388	5.06035	-22.3304	16.1316	-18.2565	-8.15176	21.1284
CCT4	51.2987	2.74195	16.6494	23.5634	25.0058	19.6957	12.8286	9.58239	14.0356	5.16354	3.41782	-20.7539	-5.73794	-7.69135	12.2037	17.9457	9.65269	5.49975	11.0327	6.3367	57.728	49.4464	57.2253	54.7999	4.64308	-8.12281	7.46253	8.93785	2.75919	9.45292	50.8887	18.6386	21.1944	30.2406	17.9274
C4A	4.65199	22.7078	-38.4432	-3.69448	31.4183	9.46156	-5.46468	-1.29613	0.90025	7.7017	-26.8767	-10.7141	-24.2858	-20.6255	8.68077	4.75402	7.11978	6.52191	6.13191	1.23016	2.70494	-4.8774	1.15521	-0.339083	4.00596	8.32682	9.96294	10.0273	9.43901	0.963718	5.83188	4.68979	-15.248	-1.57545	11.8546
CDC26	4.54753	-28.2812	-16.0749	-13.2695	16.5932	19.6554	12.1037	11.4754	14.4115	4.55222	-18.605	-13.0643	-27.7652	-19.8115	7.42432	8.09052	6.82406	6.07833	6.99764	1.01726	28.1054	26.1324	43.376	32.5379	9.43773	8.95795	17.9506	26.2397	17.7161	8.64327	5.2887	6.42382	7.8584	6.52364	1.28776
DYNC1LI2	1.8317	-33.8472	-23.1033	-18.3729	18.3038	14.2786	3.42018	-1.79958	5.29972	8.2022	6.31948	-6.48633	-14.4736	-4.88014	10.4892	33.9917	29.1574	34.1267	32.4253	2.83091	58.3479	28.0412	57.1875	47.8588	17.1724	-3.06571	-2.34614	-14.1809	-6.53091	6.63482	-42.5398	-5.47759	-38.3196	-28.779	20.2896
SEC13	3.98049	-20.4769	-14.6275	-10.3746	12.7713	8.14051	-11.7477	-16.8265	-6.81124	13.1953	8.92791	-19.0996	-14.3072	-8.15964	14.991	27.3123	29.4145	-20.2215	12.1685	28.0702	80.2218	66.5993	82.0777	76.2996	8.45181	2.97627	9.48457	6.47363	6.31149	3.25718	23.6736	-2.0165	26.682	16.113	15.7725
PPIE	11.9639	-18.5669	-3.76412	-3.45573	15.2677	5.55883	-7.35362	-8.32427	-3.37302	7.75042	-36.0806	-34.9033	-88.967	-53.317	30.8794	-20.8451	-20.6393	-14.1399	-18.5414	3.81321	45.693	38.1484	53.2942	45.7119	7.57292	-26.1844	-19.9776	-8.38411	-18.1821	9.03499	-15.2132	-39.8726	-36.9199	-30.6686	13.4659
VAPA	10.2329	41.2561	-46.8146	1.55812	44.6716	10.1463	6.73086	1.86553	6.24755	4.16146	20.5214	3.19024	-16.9769	2.2449	18.767	-111.586	-3.97615	14.3521	-33.7367	68.0395	30.9403	22.1938	42.4008	31.8449	10.1338	-11.0815	-12.9668	-5.8234	-9.95725	3.70205		52.0587	20.2543	36.1565	22.4891
AP2M1	-17.7611	-23.342	-23.7151	-21.6061	3.33504	20.8435	17.263	-7.21668	10.2966	15.2723	-36.4526	-8.48642	-49.7267	-31.5553	21.0518	-4.75402	13.6063	8.87482	5.90904	9.53271	59.0812	53.109	61.9198	58.0367	4.4973	-8.72982	-16.416	-8.43637	-11.1941	4.52469	51.4528	9.86402	-26.1745	11.7141	38.8467
SF3A2	28.5722	-14.9408	-14.9557	-0.441448	25.1266	42.4596	38.4078	34.7226	38.53	3.86995	-3.68096	-27.1962	-37.8313	-22.9028	17.4753	47.2734	24.3615	14.3328	28.6559	16.885	89.6714	85.3699	91.584	88.8751	3.18263	-9.168	-10.0162	-0.710023	-6.63141	5.14558	20.2821	-20.095	8.57569	2.92095	20.774
AP2S1	-10.3746	-31.0717	6.99477	-11.4839	19.0575	16.0064	7.97135	-20.8058	1.05733	19.3555	-5.59789	-44.4136	-62.5544	-37.522	29.097	31.131	2.15683	10.7391	14.6756	14.8828	37.3433	13.3943	34.6937	28.4771	13.1291	-22.3735	-18.2973	-1.87581	-14.1822	10.8508	-68.0349	-47.1012	-35.5619	-50.2327	16.4614
PPP1CC	2.41366	27.1994	51.9403	27.1845	24.7633	26.5063	14.9592	20.0018	20.4891	5.78895	0.485525	-6.29377	6.48141	0.22439	6.39159	10.167	-9.57555	28.2959	9.62912	18.9415	56.0497	47.3712	63.2919	55.571	7.97112	8.5238	9.10267	15.9326	11.1863	4.12052	55.3108	31.2504	13.4853	33.3488	20.9916
POLR2E	34.556	38.0627	21.7976	31.4721	8.5599	29.1967	12.7239	23.4494	21.79	8.36084	16.3112	-13.5807	-18.2549	-5.17483	18.7536	60.3687	47.1577	52.7057	53.4107	6.63364	95.205	88.4807	91.9279	91.8712	3.36252	15.5105	20.7525	25.5724	20.6118	5.03244	35.7143	35.2477	24.2655	31.7425	6.47945
PPP2CB	-4.88328	-11.1357	11.546	-1.49097	11.7152	24.0294	14.8988	7.20611	15.3781	8.42185	8.7047	-27.4019	-34.7633	-17.8202	23.2642	12.0249	2.9347	5.24903	6.7362	4.72404	3.68014	-5.17223	5.38863	1.29885	5.66885	1.64567	8.54792	7.41027	5.86795	3.70059	3.2204	-19.8234	-3.68089	-6.76128	11.8267
SH3KBP1	-24.4015	-42.5468	-24.879	-30.6091	10.3411	11.568	6.87182	4.56401	7.66794	3.56921	10.254	-14.618	-17.9004	-7.42146	15.3951	9.60126	19.2379	19.315	16.0514	5.58611	3.98253	-19.2635	-4.9719	-6.75094	11.7247	-6.92486	-10.8443	-8.16703	-8.6454	2.00304	-46.7043	-29.1899	-29.747	-35.2137	9.955
ON-TARGETplus Non-targeting Control	-53.0222	-5.19665	-37.6673	-31.962	24.4179	4.28208	1.18487	-5.50093	-0.0113276	5	-24.6928	-27.1043	-9.91318	-20.5701	9.30759	2.07968	-41.2947	-6.32905	-15.1814	23.0023	29.2167	8.77914	41.8451	26.6137	16.686	-19.6158	-15.1939	1.91098	-10.9663	11.3691	-51.3562	-64.2604	-46.6416	-54.0861	9.12113
ON-TARGETplus Cyclophilin Control	4.66691	-20.8948	-46.6803	-20.9694	25.6737	4.47943	-0.772542	-15.0383	-3.77712	10.0998	-1.37451	-21.4979	-7.23035	-10.0343	10.3506	-104.148	-96.0672	-42.4326	-80.8827	33.5429	10.8013	19.7671	12.8689	14.4791	4.69477	-5.89174	-16.6572	-1.17232	-7.90707	7.9367		25.4563	4.27196	14.8641	14.9796
ON-TARGETplus GAPD Control	-6.21135	0.399168	-37.1002	-14.3041	20.0168	13.755	-0.116045	-18.506	-1.62236	16.1832	1.62343	-58.3311	-52.3833	-36.3636	33.0319	57.7779	-43.6284	26.5409	13.5635	51.9338	53.8877	52.1943	55.0594	53.7138	1.44045	-22.3534	-9.76697	-6.84447	-12.9883	8.24103	40.5542	-11.7034	-44.8658	-5.33831	43.0642
	Significant Negative Impact on Cell Survival
