# Supplementary material for: Network propagation-based prioritization of long tail genes in 17 cancer types
Source: Genome Biol. 2021 Oct 7;22:287. doi: 10.1186/s13059-021-02504-x (PMC8496153; doi:10.1186/s13059-021-02504-x)
Supplement: Supplementary file 8 — Additional file 8: Table S7. References of functionally validated genes in Table S5 [file 13059_2021_2504_MOESM8_ESM.xlsx]

## Sheet: S7
Gene	Paper	Other Paper(s)
BIRC5	https://pubmed.ncbi.nlm.nih.gov/21859926/
COL4A2	https://pubmed.ncbi.nlm.nih.gov/25169943/
DDX58	https://cancerci.biomedcentral.com/articles/10.1186/s12935-018-0639-3
EXO1	https://www.ncbi.nlm.nih.gov/pmc/articles/PMC6237436/
GOT1	https://cancerandmetabolism.biomedcentral.com/articles/10.1186/s40170-019-0202-2
ITGA4	https://pubmed.ncbi.nlm.nih.gov/29377440/
ITGAM	https://onlinelibrary.wiley.com/doi/full/10.1002/ijc.32673
ITGAX	https://onlinelibrary.wiley.com/doi/full/10.1002/jcb.27480
JAK3	https://pubmed.ncbi.nlm.nih.gov/21414324/
KAT2B	https://www.ncbi.nlm.nih.gov/pmc/articles/PMC6488821/
MAP2K2	https://www.jci.org/articles/view/74440
MAP2K1	https://pubmed.ncbi.nlm.nih.gov/30217449/
NCOA6	https://www.ncbi.nlm.nih.gov/pmc/articles/PMC2254332/
PIK3CD	https://www.ncbi.nlm.nih.gov/pmc/articles/PMC6398891/
PRKACB	https://www.ncbi.nlm.nih.gov/pmc/articles/PMC4695158/
MDM2	https://link.springer.com/article/10.1186/bcr2804
WDR5	https://www.ncbi.nlm.nih.gov/pmc/articles/PMC4427524/
GRB2	https://www.nature.com/articles/1202422
PRKACB	https://pubmed.ncbi.nlm.nih.gov/23833645/
PRKAR2B	https://pubmed.ncbi.nlm.nih.gov/29761841/
NUP37	https://pubmed.ncbi.nlm.nih.gov/32014308/
SYK	https://jhoonline.biomedcentral.com/articles/10.1186/s13045-017-0512-1
PIK3R2	https://www.ncbi.nlm.nih.gov/pmc/articles/PMC5356720/
TOP2A	https://www.sciencedirect.com/science/article/pii/S0925443917303836
RBBP5	https://www.cell.com/cell-stem-cell/pdf/S1934-5909(16)30457-X.pdf
AP2M1	https://pubmed.ncbi.nlm.nih.gov/30260026/
ITGB3	https://molecular-cancer.biomedcentral.com/articles/10.1186/s12943-018-0924-8
CTNNB1	https://www.ncbi.nlm.nih.gov/pmc/articles/PMC5797067/
RUVBL1	https://europepmc.org/article/med/27722820
CDK1	https://cancerres.aacrjournals.org/content/early/2018/10/06/0008-5472.CAN-18-0330
WASL	https://www.ncbi.nlm.nih.gov/pmc/articles/PMC7259520/
CDH2	https://link.springer.com/article/10.1007/s12032-018-1104-9
NEK2	https://www.ncbi.nlm.nih.gov/pmc/articles/PMC6895449/
TPX2	https://www.nature.com/articles/s41388-018-0470-2
EIF4E	https://www.pnas.org/content/115/10/E2202
TFDP1	https://pubmed.ncbi.nlm.nih.gov/14618416/
MAPK9	https://pubmed.ncbi.nlm.nih.gov/14724588/?dopt=Abstract
ANAPC4	https://www.pnas.org/content/115/7/E1570
HDAC2	https://www.ncbi.nlm.nih.gov/pmc/articles/PMC5446485/
SRC	https://www.nature.com/articles/1203912
FEN1	https://pubmed.ncbi.nlm.nih.gov/28371273/
CSNK1E	https://pubmed.ncbi.nlm.nih.gov/18518968/
RNF2	https://cancerdiscovery.aacrjournals.org/content/5/12/1314
CETN2	https://clincancerres.aacrjournals.org/content/clincanres/early/2018/05/23/1078-0432.CCR-17-3702.full.pdf
CXCR4	https://www.ncbi.nlm.nih.gov/pmc/articles/PMC4322894/
NCAPG	https://www.spandidos-publications.com/10.3892/ijmm.2017.3079
MAPK14	https://pubmed.ncbi.nlm.nih.gov/32243890/
PRKAR2A	https://www.ncbi.nlm.nih.gov/pmc/articles/PMC4660639/
IRF7	https://www.nature.com/articles/nm.2830
RFC4	https://clincancerres.aacrjournals.org/content/25/14/4567.figures-only
P4HB	https://www.spandidos-publications.com/10.3892/mmr.2018.9660
CPSF2	https://www.ncbi.nlm.nih.gov/pmc/articles/PMC4079301/
MCM2	https://www.ncbi.nlm.nih.gov/pmc/articles/PMC6691261/
CCND1	https://www.mycancergenome.org/content/gene/ccnd1/
EED	https://cancerres.aacrjournals.org/content/early/2019/08/08/0008-5472.CAN-19-0428
PPP2CA	https://www.ncbi.nlm.nih.gov/pmc/articles/PMC3992501/
BIRC5	https://jeccr.biomedcentral.com/articles/10.1186/s13046-019-1362-1
PSEN1	https://www.ncbi.nlm.nih.gov/pmc/articles/PMC4891148/
DSN1	https://www.ncbi.nlm.nih.gov/pmc/articles/PMC5216762/
CPSF4	https://www.ncbi.nlm.nih.gov/pmc/articles/PMC5528626/
TRAF2	https://pubmed.ncbi.nlm.nih.gov/24362534/
FZR1	https://www.ncbi.nlm.nih.gov/pmc/articles/PMC5383867/
FGF2	https://pubmed.ncbi.nlm.nih.gov/30843188/
SKP1	https://mcb.asm.org/content/22/23/8375
BECN1	https://pubmed.ncbi.nlm.nih.gov/21875280/
SYT1	https://www.ncbi.nlm.nih.gov/pmc/articles/PMC6949727/
CASP3	https://europepmc.org/article/PMC/6204286
TGFB1	https://www.ncbi.nlm.nih.gov/pmc/articles/PMC5039479/
CDC23	https://pubmed.ncbi.nlm.nih.gov/21990323/
PSMC5	https://www.sciencedirect.com/science/article/pii/S0006291X15309463
HDAC1	https://pubmed.ncbi.nlm.nih.gov/28779562/
RHOA	https://www.nature.com/articles/s41598-019-52746-w
VEGFA	https://pubmed.ncbi.nlm.nih.gov/17052163/
DLG1	https://www.ncbi.nlm.nih.gov/pmc/articles/PMC4006353/
FGG	https://www.ncbi.nlm.nih.gov/pmc/articles/PMC6389006/
ITGB1	https://pubmed.ncbi.nlm.nih.gov/25387809/
ITGB5	https://www.ncbi.nlm.nih.gov/pmc/articles/PMC3481019/
TRAF6	https://pubmed.ncbi.nlm.nih.gov/30945383/
NDC80	https://www.ncbi.nlm.nih.gov/pmc/articles/PMC4497439/
KIF15	https://www.ncbi.nlm.nih.gov/pmc/articles/PMC5520515/
RAC2	https://www.ncbi.nlm.nih.gov/pmc/articles/PMC4000195/
BMP2	https://www.nature.com/articles/cddiscovery201739
IRF3	https://rupress.org/jem/article/215/2/699/42539/Targeting-IRF3-as-a-YAP-agonist-therapy-against
MAPK3	https://cancerres.aacrjournals.org/content/74/2/412
BMP4	https://www.cell.com/molecular-therapy-family/nucleic-acids/fulltext/S2162-2531(18)30202-6
HSPA5	https://www.ncbi.nlm.nih.gov/pmc/articles/PMC5240825/
CASP8	https://www.ncbi.nlm.nih.gov/pmc/articles/PMC3049203/
CCNB1	https://www.spandidos-publications.com/10.3892/ol.2019.10847/abstract
STAT5A	https://cancerres.aacrjournals.org/content/73/7/2052
TIMP1	https://journals.plos.org/plosone/article?id=10.1371/journal.pone.0077366
DCN	https://www.nature.com/articles/1208329
ITGA5	https://jhu.pure.elsevier.com/en/publications/hypoxia-selectively-enhances-integrin-αsub5subβsub1sub-receptor-e
PPL	https://pubmed.ncbi.nlm.nih.gov/24336635/
CPSF3	https://www.nature.com/articles/s41589-019-0424-1?draft=marketing
RACGAP1	https://pubmed.ncbi.nlm.nih.gov/29095547/
SMC1A	https://www.spandidos-publications.com/10.3892/ijo.2016.3697?text=fulltext
GDI1	https://cancerres.aacrjournals.org/content/65/14/6054.full
PLCG1	https://pubmed.ncbi.nlm.nih.gov/30623526/
CDK4	https://journals.sagepub.com/doi/pdf/10.1177/1947601913478972
VHL	https://www.nature.com/articles/nrc3844/
MAP3K7	https://www.frontiersin.org/articles/10.3389/fonc.2019.00474/full
NGF	https://cancerres.aacrjournals.org/content/68/2/346
PIK3R3	https://www.karger.com/Article/FullText/489382
CDC27	https://www.nature.com/articles/cddis2015402
CFP	https://www.nature.com/articles/s41388-019-0739-0
VCP	https://www.nature.com/articles/s41388-018-0651-z
MAPK8	https://mct.aacrjournals.org/content/molcanther/early/2017/06/13/1535-7163.MCT-16-0731.full.pdf
KPNB1	https://www.ncbi.nlm.nih.gov/pmc/articles/PMC6565446/
AGT	https://jitc.biomedcentral.com/articles/10.1186/s40425-018-0401-3
BARD1	https://academic.oup.com/hmg/article/7/2/195/641045	https://cancerres.aacrjournals.org/content/72/8/2068.short
BTRC	https://www.nature.com/articles/s41467-018-03716-9
C1GALT1C1	https://www.sciencedirect.com/science/article/pii/S2210740119301834
CCNA2	https://www.ncbi.nlm.nih.gov/pmc/articles/PMC6217169/
CCNB2	https://link.springer.com/article/10.1186/s11658-019-0184-7
CDC16	https://www.hindawi.com/journals/jo/2019/3542537/
CUL2	https://www.ncbi.nlm.nih.gov/pmc/articles/PMC5058775/
CYP3A4	https://www.ncbi.nlm.nih.gov/pmc/articles/PMC3093829/
EDN1	https://www.nature.com/articles/1208237
FGFR1OP	https://onlinelibrary.wiley.com/doi/pdf/10.1111/j.1349-7006.2007.00610.x
KAT2B	https://www.ncbi.nlm.nih.gov/pmc/articles/PMC6488821/
KLHL2	https://www.ncbi.nlm.nih.gov/pmc/articles/PMC6956814/
MAPRE1	https://pubmed.ncbi.nlm.nih.gov/29484424/
MEN1	https://www.ncbi.nlm.nih.gov/pmc/articles/PMC3700119/
PPP1CA	https://www.nature.com/articles/s41467-017-02272-y
PPP1CB	https://www.ncbi.nlm.nih.gov/pmc/articles/PMC3581970/
PPP2R1A	https://www.ncbi.nlm.nih.gov/pmc/articles/PMC3910639/
PRKCA	https://europepmc.org/article/pmc/pmc3154499
PTPN6	https://pubmed.ncbi.nlm.nih.gov/19838216/
RBBP4	https://www.ncbi.nlm.nih.gov/pmc/articles/PMC4805508/
RBBP7	https://www.spandidos-publications.com/10.3892/ol.2018.9543
RUVBL2	https://cancerci.biomedcentral.com/articles/10.1186/s12935-019-0974-z
SLC9A1	https://www.ncbi.nlm.nih.gov/pmc/articles/PMC5354654/
SMARCC1	https://www.ncbi.nlm.nih.gov/pmc/articles/PMC4004525/
SMC3	https://molecular-cancer.biomedcentral.com/articles/10.1186/1476-4598-5-52
UBE2I	https://cancerci.biomedcentral.com/articles/10.1186/s12935-020-01311-x
ZC3HAV1	https://www.nature.com/articles/ncomms6362
ACTL6A	https://bmccancer.biomedcentral.com/articles/10.1186/s12885-018-4931-3
AKT1	https://www.ncbi.nlm.nih.gov/pmc/articles/PMC5347151/
AP2B1	https://pubmed.ncbi.nlm.nih.gov/28724549/
ASH2L	http://atlasgeneticsoncology.org/Deep/ASH2LFunctionID20097.html
AURKA	https://www.ncbi.nlm.nih.gov/pmc/articles/PMC5410356/
CCNA1	https://www.omicsonline.org/open-access/cyclin-a1-expression-is-reciprocally-controlled-by-the-transcription-factor-znf217-and-mirnas-in-invasive-breast-and-prostate-canc-99197.html
CDK2	https://www.sciencedirect.com/science/article/pii/S135964461930460X
COL1A1	https://www.ncbi.nlm.nih.gov/pmc/articles/PMC5865965/
COL1A2	https://www.jcancer.org/v09p2953
COL4A1	https://www.ncbi.nlm.nih.gov/pmc/articles/PMC5601642/
COPA	https://www.pnas.org/content/108/30/12449
CREB1	https://www.spandidos-publications.com/or/37/6/3361?text=fulltext
CSTF3	https://www.ncbi.nlm.nih.gov/pmc/articles/PMC5553310/
CTBP1	https://pubmed.ncbi.nlm.nih.gov/23097625/
CTNNA1	https://ashpublications.org/blood/article/118/21/5240/81874/Evaluation-of-a-Catenin-CTNNA1-As-a-Tumor
CUL3	https://pubmed.ncbi.nlm.nih.gov/27200299/
CUL5	https://www.jci.org/articles/view/122779
DHX15	https://www.ncbi.nlm.nih.gov/pmc/articles/PMC5794523/
DYNC1H1	https://www.frontiersin.org/articles/10.3389/fonc.2019.00491/full
EGFR	https://www.ncbi.nlm.nih.gov/pmc/articles/PMC5748484/
EIF4G1	https://www.oncotarget.com/article/8168/text/
EZH2	https://mct.aacrjournals.org/content/17/3/591
FKBP1A	https://www.ncbi.nlm.nih.gov/pmc/articles/PMC283578/
GAPDH	https://www.spandidos-publications.com/10.3892/ijo.2016.3774
GTPBP4	https://www.ncbi.nlm.nih.gov/pmc/articles/PMC5706849/
HGF	https://www.ncbi.nlm.nih.gov/pmc/articles/PMC5406710/
HIF1A	https://www.ncbi.nlm.nih.gov/pmc/articles/PMC4629436/
HSPA2	http://atm.amegroups.com/article/view/30840/html
HSPA4	https://www.ncbi.nlm.nih.gov/pmc/articles/PMC3022804/
HSPA8	https://www.ncbi.nlm.nih.gov/pmc/articles/PMC4835145/
IKBKB	https://www.ncbi.nlm.nih.gov/pmc/articles/PMC5748694/
ILK	https://www.nature.com/articles/nrc1524
IRF4	https://www.ncbi.nlm.nih.gov/pmc/articles/PMC2790720/
ITGA1	https://www.nature.com/articles/s41598-017-09946-z
ITGA2	https://jeccr.biomedcentral.com/articles/10.1186/s13046-019-1496-1
JAK2	https://www.nature.com/articles/nrc2210
JUP	https://journals.plos.org/plosone/article?id=10.1371/journal.pone.0154323
KEAP1	https://biosignaling.biomedcentral.com/articles/10.1186/s12964-019-0435-2
KIF20A	https://cancerres.aacrjournals.org/content/65/1/105
KIF3A	https://www.ncbi.nlm.nih.gov/pmc/articles/PMC5838305/
KIF4A	https://www.nature.com/articles/s41598-017-04176-9
LAMC1	https://www.ncbi.nlm.nih.gov/pmc/articles/PMC5604451/
MAPK1	https://pubmed.ncbi.nlm.nih.gov/26614994/
MMP9	https://www.ncbi.nlm.nih.gov/pmc/articles/PMC4058041/
MTOR	https://www.ncbi.nlm.nih.gov/pmc/articles/PMC6387042/
NCOA1	https://www.ncbi.nlm.nih.gov/pmc/articles/PMC4695159/
NFKB1	https://www.cell.com/immunity/pdfExtended/S1074-7613(18)30079-7
NRP1	https://www.jci.org/articles/view/99257
NUP107	https://www.karger.com/Article/Abstract/502788
NUP153	https://pubmed.ncbi.nlm.nih.gov/20561986/
PABPC1	https://www.ncbi.nlm.nih.gov/pmc/articles/PMC4466948/
PAK2	https://www.ncbi.nlm.nih.gov/pmc/articles/PMC6425405/
PEBP1	https://www.ncbi.nlm.nih.gov/pmc/articles/PMC5843398/
PES1	https://dm5migu4zj3pb.cloudfront.net/manuscripts/65000/65133/cache/65133.2-20150223184104-covered-253bed37ca4c1ab43d105aefdf7b5536.pdf
PIK3CB	https://www.nature.com/articles/sigtrans201763
PLCG2	https://cancerci.biomedcentral.com/articles/10.1186/1475-2867-12-30
PRKCD	https://pubmed.ncbi.nlm.nih.gov/12657722/
PRPF3	https://www.ncbi.nlm.nih.gov/pmc/articles/PMC4035536/
PSMC1	https://www.ncbi.nlm.nih.gov/pmc/articles/PMC3324507/
PSMC2	https://www.ncbi.nlm.nih.gov/pmc/articles/PMC6775526/
RAB1A	https://www.spandidos-publications.com/10.3892/or.2019.7071
RELA	https://www.ncbi.nlm.nih.gov/pmc/articles/PMC2364001/
RPL23A	https://www.nature.com/articles/s41598-017-02403-x
RPS23	https://www.spandidos-publications.com/10.3892/mmr.2013.1430
RPS6KB1	https://www.ncbi.nlm.nih.gov/pmc/articles/PMC3466514/
SH3GL2	https://www.ncbi.nlm.nih.gov/pmc/articles/PMC3689238/
SIN3A	https://www.ncbi.nlm.nih.gov/pmc/articles/PMC5340233/
SMARCA4	https://www.nature.com/articles/s41467-019-08380-1
SMARCD3	https://www.biorxiv.org/content/10.1101/684217v1.full
SNRPA1	https://mcb.asm.org/content/33/15/3011.short
SNX2	https://pubmed.ncbi.nlm.nih.gov/23360489/
SOS1	https://www.pnas.org/content/116/7/2551
STAG2	https://www.spandidos-publications.com/10.3892/or.2017.5711
SUZ12	https://pubmed.ncbi.nlm.nih.gov/24633887/
TPM1	https://www.spandidos-publications.com/10.3892/ol.2018.8204
TUBB4B	https://www.ncbi.nlm.nih.gov/pmc/articles/PMC6721557/
VCL	https://www.ncbi.nlm.nih.gov/pmc/articles/PMC5669901/
